# Supplementary material
Source: publisher figshare collection journal article supplement (https://acs.figshare.com/ndownloader/files/4057165)
Supplement: Supplementary file 1 [file 4057165]

data_cp012a_0ma 
 
_audit_creation_method            SHELXL-97 
_chemical_name_systematic 
; 
 ? 
; 
_chemical_name_common             ? 
_chemical_melting_point           ? 
_chemical_formula_moiety          ? 
_chemical_formula_sum 
 'C38 H36 Cl2 Fe N2 O2' 
_chemical_formula_weight          679.44 
 
loop_ 
 _atom_type_symbol 
 _atom_type_description 
 _atom_type_scat_dispersion_real 
 _atom_type_scat_dispersion_imag 
 _atom_type_scat_source 
 'C'  'C'   0.0033   0.0016 
 'International Tables Vol C Tables 4.2.6.8 and 6.1.1.4' 
 'H'  'H'   0.0000   0.0000 
 'International Tables Vol C Tables 4.2.6.8 and 6.1.1.4' 
 'Cl'  'Cl'   0.1484   0.1585 
 'International Tables Vol C Tables 4.2.6.8 and 6.1.1.4' 
 'Fe'  'Fe'   0.3463   0.8444 
 'International Tables Vol C Tables 4.2.6.8 and 6.1.1.4' 
 'N'  'N'   0.0061   0.0033 
 'International Tables Vol C Tables 4.2.6.8 and 6.1.1.4' 
 'O'  'O'   0.0106   0.0060 
 'International Tables Vol C Tables 4.2.6.8 and 6.1.1.4' 
 
_symmetry_cell_setting            Monoclinic 
_symmetry_space_group_name_H-M    P21/c 
 
loop_ 
 _symmetry_equiv_pos_as_xyz 
 'x, y, z' 
 '-x, y+1/2, -z+1/2' 
 '-x, -y, -z' 
 'x, -y-1/2, z-1/2' 
 
_cell_length_a                    10.7373(12) 
_cell_length_b                    22.229(2) 
_cell_length_c                    16.1552(18) 
_cell_angle_alpha                 90.00 
_cell_angle_beta                  116.914(7) 
_cell_angle_gamma                 90.00 
_cell_volume                      3438.3(6) 
_cell_formula_units_Z             4 
_cell_measurement_temperature     150(2) 
_cell_measurement_reflns_used     ? 
_cell_measurement_theta_min       ? 
_cell_measurement_theta_max       ? 
 
_exptl_crystal_description        Needle 
_exptl_crystal_colour             colourless 
_exptl_crystal_size_max           0.2 
_exptl_crystal_size_mid           0.02
_exptl_crystal_size_min           0.02
_exptl_crystal_density_meas       ? 
_exptl_crystal_density_diffrn     1.313 
_exptl_crystal_density_method     'not measured' 
_exptl_crystal_F_000              1416 
_exptl_absorpt_coefficient_mu     0.629 
_exptl_absorpt_correction_type    multi-scan 
_exptl_absorpt_correction_T_min   0.6711 
_exptl_absorpt_correction_T_max   0.7456 
_exptl_absorpt_process_details    SADABS 
 
_exptl_special_details 
; 
 ? 
; 
 
_diffrn_ambient_temperature       150(2) 
_diffrn_radiation_wavelength      0.71073 
_diffrn_radiation_type            MoK\a 
_diffrn_radiation_source          'fine-focus sealed tube' 
_diffrn_radiation_monochromator   graphite 
_diffrn_measurement_device_type   ? 
_diffrn_measurement_method        ? 
_diffrn_detector_area_resol_mean  ? 
_diffrn_reflns_number             35708 
_diffrn_reflns_av_R_equivalents   0.1486 
_diffrn_reflns_av_sigmaI/netI     0.1340 
_diffrn_reflns_limit_h_min        -12 
_diffrn_reflns_limit_h_max        12 
_diffrn_reflns_limit_k_min        -26 
_diffrn_reflns_limit_k_max        26 
_diffrn_reflns_limit_l_min        -19 
_diffrn_reflns_limit_l_max        19 
_diffrn_reflns_theta_min          1.68 
_diffrn_reflns_theta_max          25.00 
_reflns_number_total              6056 
_reflns_number_gt                 3159 
_reflns_threshold_expression      >2sigma(I) 
 
_computing_data_collection        ? 
_computing_cell_refinement        ? 
_computing_data_reduction         ? 
_computing_structure_solution     'SHELXS-97 (Sheldrick, 2008)' 
_computing_structure_refinement   'SHELXL-97 (Sheldrick, 2008)' 
_computing_molecular_graphics     ? 
_computing_publication_material   ? 
 
_refine_special_details 
; 
 Refinement of F^2^ against ALL reflections.  The weighted R-factor wR and 
 goodness of fit S are based on F^2^, conventional R-factors R are based 
 on F, with F set to zero for negative F^2^. The threshold expression of 
 F^2^ > 2sigma(F^2^) is used only for calculating R-factors(gt) etc. and is 
 not relevant to the choice of reflections for refinement.  R-factors based 
 on F^2^ are statistically about twice as large as those based on F, and R- 
 factors based on ALL data will be even larger. 
; 
 
_refine_ls_structure_factor_coef  Fsqd  
_refine_ls_matrix_type            full 
_refine_ls_weighting_scheme       calc  
_refine_ls_weighting_details 
 'calc w=1/[\s^2^(Fo^2^)+(0.0346P)^2^+0.0000P] where P=(Fo^2^+2Fc^2^)/3' 
_atom_sites_solution_primary      direct 
_atom_sites_solution_secondary    difmap 
_atom_sites_solution_hydrogens    geom 
_refine_ls_hydrogen_treatment     constr 
_refine_ls_extinction_method      none 
_refine_ls_extinction_coef        ? 
_refine_ls_number_reflns          6056 
_refine_ls_number_parameters      411 
_refine_ls_number_restraints      0 
_refine_ls_R_factor_all           0.1373 
_refine_ls_R_factor_gt            0.0518 
_refine_ls_wR_factor_ref          0.1084 
_refine_ls_wR_factor_gt           0.0843 
_refine_ls_goodness_of_fit_ref    0.950 
_refine_ls_restrained_S_all       0.950 
_refine_ls_shift/su_max           0.001 
_refine_ls_shift/su_mean          0.000 
 
loop_ 
 _atom_site_label 
 _atom_site_type_symbol 
 _atom_site_fract_x 
 _atom_site_fract_y 
 _atom_site_fract_z 
 _atom_site_U_iso_or_equiv 
 _atom_site_adp_type 
 _atom_site_occupancy 
 _atom_site_symmetry_multiplicity 
 _atom_site_calc_flag 
 _atom_site_refinement_flags 
 _atom_site_disorder_assembly 
 _atom_site_disorder_group 
Fe1 Fe 0.27294(6) 0.29188(3) 0.40265(4) 0.02927(18) Uani 1 1 d . . . 
Cl1 Cl 0.29782(12) 0.38799(5) 0.37736(8) 0.0465(3) Uani 1 1 d . . . 
Cl2 Cl 0.25118(12) 0.26753(5) 0.53031(7) 0.0423(3) Uani 1 1 d . . . 
O1 O 0.4914(3) 0.18410(12) 0.35590(17) 0.0333(7) Uani 1 1 d . . . 
O2 O -0.0053(3) 0.20855(13) 0.21817(17) 0.0359(7) Uani 1 1 d . . . 
N1 N 0.1532(3) 0.14530(14) 0.2082(2) 0.0244(8) Uani 1 1 d . . . 
N2 N 0.2967(3) 0.13651(14) 0.2508(2) 0.0250(8) Uani 1 1 d . . . 
C1 C 0.2515(4) 0.22174(17) 0.3133(2) 0.0239(10) Uani 1 1 d . . . 
C2 C 0.1308(4) 0.19495(17) 0.2482(3) 0.0257(10) Uani 1 1 d . . . 
C4 C 0.0542(4) 0.10066(17) 0.1528(3) 0.0231(9) Uani 1 1 d . . . 
C5 C 0.0108(4) 0.09883(18) 0.0584(2) 0.0281(10) Uani 1 1 d . . . 
H5 H 0.0479 0.1251 0.0305 0.034 Uiso 1 1 calc R . . 
C6 C -0.0896(4) 0.0567(2) 0.0060(3) 0.0375(12) Uani 1 1 d . . . 
H4 H -0.1213 0.0550 -0.0579 0.045 Uiso 1 1 calc R . . 
C7 C -0.1423(4) 0.01771(19) 0.0480(3) 0.0398(12) Uani 1 1 d . . . 
H3 H -0.2090 -0.0105 0.0122 0.048 Uiso 1 1 calc R . . 
C8 C -0.0977(5) 0.0197(2) 0.1424(3) 0.0448(13) Uani 1 1 d . . . 
H2 H -0.1337 -0.0070 0.1705 0.054 Uiso 1 1 calc R . . 
C9 C 0.0007(4) 0.06156(19) 0.1947(3) 0.0359(11) Uani 1 1 d . . . 
H1 H 0.0312 0.0635 0.2585 0.043 Uiso 1 1 calc R . . 
C11 C 0.3643(4) 0.08890(18) 0.2257(3) 0.0259(10) Uani 1 1 d . . . 
C12 C 0.4122(4) 0.0993(2) 0.1619(3) 0.0444(13) Uani 1 1 d . . . 
H10 H 0.4011 0.1367 0.1337 0.053 Uiso 1 1 calc R . . 
C13 C 0.4783(5) 0.0523(3) 0.1402(3) 0.0556(15) Uani 1 1 d . . . 
H6 H 0.5124 0.0585 0.0972 0.067 Uiso 1 1 calc R . . 
C14 C 0.4933(5) -0.0024(2) 0.1810(4) 0.0583(16) Uani 1 1 d . . . 
H7 H 0.5371 -0.0334 0.1657 0.070 Uiso 1 1 calc R . . 
C15 C 0.4445(5) -0.0118(2) 0.2442(4) 0.0644(16) Uani 1 1 d . . . 
H8 H 0.4552 -0.0493 0.2721 0.077 Uiso 1 1 calc R . . 
C16 C 0.3790(5) 0.0341(2) 0.2671(3) 0.0510(13) Uani 1 1 d . . . 
H9 H 0.3454 0.0277 0.3103 0.061 Uiso 1 1 calc R . . 
C17 C 0.3516(4) 0.18343(17) 0.3106(3) 0.0257(10) Uani 1 1 d . . . 
C19 C 0.5500(4) 0.23487(19) 0.4133(3) 0.0267(10) Uani 1 1 d . . . 
C20 C 0.5912(4) 0.2288(2) 0.5080(3) 0.0314(11) Uani 1 1 d . . . 
C21 C 0.6554(4) 0.2785(2) 0.5635(3) 0.0352(11) Uani 1 1 d . . . 
H16 H 0.6838 0.2765 0.6270 0.042 Uiso 1 1 calc R . . 
C22 C 0.6775(4) 0.3304(2) 0.5262(3) 0.0382(12) Uani 1 1 d . . . 
H15 H 0.7213 0.3629 0.5646 0.046 Uiso 1 1 calc R . . 
C23 C 0.6349(4) 0.3345(2) 0.4321(3) 0.0374(11) Uani 1 1 d . . . 
H14 H 0.6499 0.3701 0.4077 0.045 Uiso 1 1 calc R . . 
C24 C 0.5703(4) 0.2869(2) 0.3732(3) 0.0293(10) Uani 1 1 d . . . 
C25 C 0.5199(4) 0.2915(2) 0.2698(2) 0.0458(12) Uani 1 1 d . . . 
H11 H 0.4203 0.2961 0.2393 0.069 Uiso 1 1 calc R . . 
H12 H 0.5451 0.2557 0.2478 0.069 Uiso 1 1 calc R . . 
H13 H 0.5625 0.3258 0.2565 0.069 Uiso 1 1 calc R . . 
C26 C 0.5663(4) 0.1718(2) 0.5487(3) 0.0480(13) Uani 1 1 d . . . 
H17 H 0.5679 0.1380 0.5121 0.072 Uiso 1 1 calc R . . 
H18 H 0.4769 0.1739 0.5485 0.072 Uiso 1 1 calc R . . 
H19 H 0.6381 0.1671 0.6112 0.072 Uiso 1 1 calc R . . 
C28 C -0.0351(4) 0.26741(18) 0.2385(3) 0.0245(9) Uani 1 1 d . . . 
C29 C -0.0279(4) 0.3150(2) 0.1857(3) 0.0306(10) Uani 1 1 d . . . 
C30 C -0.0648(4) 0.3708(2) 0.2049(3) 0.0385(11) Uani 1 1 d . . . 
H90 H -0.0599 0.4041 0.1718 0.046 Uiso 1 1 calc R . . 
C31 C -0.1087(4) 0.3781(2) 0.2718(3) 0.0395(12) Uani 1 1 d . . . 
H26 H -0.1318 0.4163 0.2841 0.047 Uiso 1 1 calc R . . 
C32 C -0.1189(4) 0.3294(2) 0.3210(3) 0.0354(11) Uani 1 1 d . . . 
H22 H -0.1498 0.3350 0.3657 0.043 Uiso 1 1 calc R . . 
C33 C -0.0837(4) 0.27210(19) 0.3046(2) 0.0290(10) Uani 1 1 d . . . 
C34 C -0.0972(4) 0.2174(2) 0.3552(3) 0.0471(13) Uani 1 1 d . . . 
H23 H -0.1430 0.2283 0.3921 0.071 Uiso 1 1 calc R . . 
H24 H -0.0060 0.2017 0.3947 0.071 Uiso 1 1 calc R . . 
H25 H -0.1512 0.1872 0.3109 0.071 Uiso 1 1 calc R . . 
C35 C 0.0162(5) 0.3053(2) 0.1108(3) 0.0549(14) Uani 1 1 d . . . 
H28 H -0.0299 0.2704 0.0752 0.082 Uiso 1 1 calc R . . 
H29 H 0.1155 0.2996 0.1384 0.082 Uiso 1 1 calc R . . 
H30 H -0.0089 0.3399 0.0708 0.082 Uiso 1 1 calc R . . 
C36 C 0.1514(6) -0.0444(3) 0.6417(4) 0.094(2) Uani 1 1 d . . . 
H32 H 0.1639 -0.0212 0.6950 0.141 Uiso 1 1 calc R . . 
H37 H 0.2062 -0.0805 0.6615 0.141 Uiso 1 1 calc R . . 
H38 H 0.0546 -0.0547 0.6064 0.141 Uiso 1 1 calc R . . 
C37 C 0.1979(5) -0.0079(3) 0.5822(3) 0.0523(14) Uani 1 1 d . . . 
C38 C 0.1988(5) 0.0546(3) 0.5861(3) 0.0657(16) Uani 1 1 d . . . 
H39 H 0.1725 0.0737 0.6270 0.079 Uiso 1 1 calc R . . 
C39 C 0.2380(5) 0.0891(2) 0.5302(4) 0.0614(15) Uani 1 1 d . . . 
H34 H 0.2374 0.1309 0.5330 0.074 Uiso 1 1 calc R . . 
C40 C 0.2779(6) 0.0605(3) 0.4704(3) 0.0719(18) Uani 1 1 d . . . 
H33 H 0.3028 0.0829 0.4315 0.086 Uiso 1 1 calc R . . 
C41 C 0.2397(6) -0.0346(3) 0.5238(4) 0.0726(17) Uani 1 1 d . . . 
H36 H 0.2406 -0.0763 0.5209 0.087 Uiso 1 1 calc R . . 
C42 C 0.2809(6) -0.0015(3) 0.4684(4) 0.085(2) Uani 1 1 d . . . 
H35 H 0.3108 -0.0210 0.4296 0.103 Uiso 1 1 calc R . . 
 
loop_ 
 _atom_site_aniso_label 
 _atom_site_aniso_U_11 
 _atom_site_aniso_U_22 
 _atom_site_aniso_U_33 
 _atom_site_aniso_U_23 
 _atom_site_aniso_U_13 
 _atom_site_aniso_U_12 
Fe1 0.0343(4) 0.0223(4) 0.0349(3) -0.0052(3) 0.0189(3) -0.0025(3) 
Cl1 0.0417(7) 0.0255(7) 0.0760(8) 0.0023(6) 0.0298(7) 0.0006(6) 
Cl2 0.0484(8) 0.0451(8) 0.0384(6) -0.0019(5) 0.0241(6) -0.0056(6) 
O1 0.0145(17) 0.0310(18) 0.0449(17) -0.0157(14) 0.0052(14) 0.0000(13) 
O2 0.0172(16) 0.0289(18) 0.0514(17) -0.0149(15) 0.0066(14) 0.0014(14) 
N1 0.012(2) 0.021(2) 0.0330(19) -0.0085(15) 0.0033(16) -0.0009(15) 
N2 0.014(2) 0.023(2) 0.0323(19) -0.0071(16) 0.0058(17) 0.0024(16) 
C1 0.017(2) 0.024(3) 0.029(2) 0.0002(18) 0.009(2) 0.0001(19) 
C2 0.020(3) 0.022(3) 0.034(2) -0.0023(19) 0.012(2) 0.002(2) 
C4 0.015(2) 0.020(3) 0.032(2) -0.0019(19) 0.009(2) 0.0007(19) 
C5 0.029(3) 0.027(3) 0.027(2) 0.0023(19) 0.011(2) 0.002(2) 
C6 0.033(3) 0.034(3) 0.031(2) -0.009(2) 0.001(2) 0.004(2) 
C7 0.026(3) 0.024(3) 0.053(3) -0.012(2) 0.004(3) -0.005(2) 
C8 0.042(3) 0.037(3) 0.053(3) 0.002(2) 0.020(3) -0.008(2) 
C9 0.035(3) 0.035(3) 0.032(2) 0.000(2) 0.010(2) -0.004(2) 
C11 0.017(2) 0.024(3) 0.030(2) -0.006(2) 0.005(2) 0.0016(19) 
C12 0.045(3) 0.050(4) 0.046(3) 0.004(2) 0.027(3) 0.012(3) 
C13 0.052(3) 0.066(4) 0.058(3) -0.016(3) 0.033(3) 0.009(3) 
C14 0.035(3) 0.047(4) 0.077(4) -0.034(3) 0.011(3) 0.012(3) 
C15 0.074(4) 0.024(3) 0.093(4) 0.004(3) 0.036(4) 0.018(3) 
C16 0.068(4) 0.029(3) 0.065(3) 0.001(3) 0.039(3) 0.004(3) 
C17 0.024(3) 0.021(3) 0.031(2) -0.0032(19) 0.011(2) -0.002(2) 
C19 0.010(2) 0.029(3) 0.034(2) -0.015(2) 0.003(2) 0.0009(19) 
C20 0.015(2) 0.040(3) 0.035(2) 0.002(2) 0.007(2) 0.006(2) 
C21 0.015(2) 0.059(4) 0.022(2) -0.004(2) -0.001(2) 0.003(2) 
C22 0.024(3) 0.043(3) 0.046(3) -0.020(2) 0.015(2) -0.007(2) 
C23 0.026(3) 0.035(3) 0.051(3) -0.003(2) 0.017(2) -0.005(2) 
C24 0.020(2) 0.035(3) 0.032(2) -0.007(2) 0.011(2) 0.000(2) 
C25 0.039(3) 0.063(3) 0.036(2) -0.003(2) 0.018(2) -0.011(3) 
C26 0.037(3) 0.051(4) 0.051(3) 0.004(2) 0.015(2) -0.002(3) 
C28 0.016(2) 0.020(2) 0.031(2) -0.0063(19) 0.005(2) 0.0028(19) 
C29 0.021(2) 0.039(3) 0.030(2) -0.001(2) 0.011(2) 0.002(2) 
C30 0.035(3) 0.037(3) 0.042(3) 0.003(2) 0.016(2) 0.005(2) 
C31 0.029(3) 0.033(3) 0.052(3) -0.007(2) 0.015(2) 0.008(2) 
C32 0.027(3) 0.045(3) 0.036(3) -0.012(2) 0.016(2) -0.001(2) 
C33 0.017(2) 0.036(3) 0.027(2) -0.001(2) 0.004(2) -0.004(2) 
C34 0.041(3) 0.056(4) 0.040(3) 0.009(2) 0.015(2) -0.007(3) 
C35 0.059(3) 0.070(4) 0.046(3) 0.001(3) 0.034(3) 0.004(3) 
C36 0.099(5) 0.108(6) 0.084(4) 0.029(4) 0.048(4) -0.025(4) 
C37 0.043(3) 0.065(4) 0.045(3) 0.011(3) 0.015(3) -0.013(3) 
C38 0.056(4) 0.081(5) 0.072(4) 0.010(3) 0.039(3) 0.006(3) 
C39 0.063(4) 0.050(4) 0.073(4) 0.004(3) 0.033(3) -0.008(3) 
C40 0.101(5) 0.064(4) 0.058(3) -0.004(3) 0.042(4) -0.039(4) 
C41 0.101(5) 0.049(4) 0.069(4) -0.004(3) 0.039(4) -0.029(4) 
C42 0.141(6) 0.066(5) 0.080(4) -0.023(3) 0.077(4) -0.045(4) 
 
_geom_special_details 
; 
 All esds (except the esd in the dihedral angle between two l.s. planes) 
 are estimated using the full covariance matrix.  The cell esds are taken 
 into account individually in the estimation of esds in distances, angles 
 and torsion angles; correlations between esds in cell parameters are only 
 used when they are defined by crystal symmetry.  An approximate (isotropic) 
 treatment of cell esds is used for estimating esds involving l.s. planes. 
; 
 
loop_ 
 _geom_bond_atom_site_label_1 
 _geom_bond_atom_site_label_2 
 _geom_bond_distance 
 _geom_bond_site_symmetry_2 
 _geom_bond_publ_flag 
Fe1 C1 2.065(4) . ? 
Fe1 Cl1 2.2140(12) . ? 
Fe1 Cl2 2.2444(11) . ? 
O1 C17 1.340(4) . ? 
O1 C19 1.414(4) . ? 
O2 C2 1.350(4) . ? 
O2 C28 1.420(4) . ? 
N1 C2 1.354(4) . ? 
N1 N2 1.388(4) . ? 
N1 C4 1.433(4) . ? 
N2 C17 1.361(4) . ? 
N2 C11 1.441(4) . ? 
C1 C2 1.381(5) . ? 
C1 C17 1.387(5) . ? 
C4 C9 1.377(5) . ? 
C4 C5 1.379(5) . ? 
C5 C6 1.388(5) . ? 
C5 H5 0.9300 . ? 
C6 C7 1.371(5) . ? 
C6 H4 0.9300 . ? 
C7 C8 1.378(5) . ? 
C7 H3 0.9300 . ? 
C8 C9 1.375(5) . ? 
C8 H2 0.9300 . ? 
C9 H1 0.9300 . ? 
C11 C12 1.364(5) . ? 
C11 C16 1.365(5) . ? 
C12 C13 1.394(6) . ? 
C12 H10 0.9300 . ? 
C13 C14 1.357(6) . ? 
C13 H6 0.9300 . ? 
C14 C15 1.359(6) . ? 
C14 H7 0.9300 . ? 
C15 C16 1.381(6) . ? 
C15 H8 0.9300 . ? 
C16 H9 0.9300 . ? 
C19 C24 1.389(5) . ? 
C19 C20 1.395(5) . ? 
C20 C21 1.394(5) . ? 
C20 C26 1.505(6) . ? 
C21 C22 1.370(6) . ? 
C21 H16 0.9300 . ? 
C22 C23 1.379(5) . ? 
C22 H15 0.9300 . ? 
C23 C24 1.382(5) . ? 
C23 H14 0.9300 . ? 
C24 C25 1.509(5) . ? 
C25 H11 0.9600 . ? 
C25 H12 0.9600 . ? 
C25 H13 0.9600 . ? 
C26 H17 0.9600 . ? 
C26 H18 0.9600 . ? 
C26 H19 0.9600 . ? 
C28 C29 1.383(5) . ? 
C28 C33 1.389(5) . ? 
C29 C30 1.378(5) . ? 
C29 C35 1.501(5) . ? 
C30 C31 1.370(5) . ? 
C30 H90 0.9300 . ? 
C31 C32 1.375(6) . ? 
C31 H26 0.9300 . ? 
C32 C33 1.389(5) . ? 
C32 H22 0.9300 . ? 
C33 C34 1.508(5) . ? 
C34 H23 0.9600 . ? 
C34 H24 0.9600 . ? 
C34 H25 0.9600 . ? 
C35 H28 0.9600 . ? 
C35 H29 0.9600 . ? 
C35 H30 0.9600 . ? 
C36 C37 1.505(6) . ? 
C36 H32 0.9600 . ? 
C36 H37 0.9600 . ? 
C36 H38 0.9600 . ? 
C37 C41 1.351(7) . ? 
C37 C38 1.392(7) . ? 
C38 C39 1.387(6) . ? 
C38 H39 0.9300 . ? 
C39 C40 1.377(7) . ? 
C39 H34 0.9300 . ? 
C40 C42 1.379(7) . ? 
C40 H33 0.9300 . ? 
C41 C42 1.376(6) . ? 
C41 H36 0.9300 . ? 
C42 H35 0.9300 . ? 
 
loop_ 
 _geom_angle_atom_site_label_1 
 _geom_angle_atom_site_label_2 
 _geom_angle_atom_site_label_3 
 _geom_angle 
 _geom_angle_site_symmetry_1 
 _geom_angle_site_symmetry_3 
 _geom_angle_publ_flag 
C1 Fe1 Cl1 125.74(11) . . ? 
C1 Fe1 Cl2 115.78(11) . . ? 
Cl1 Fe1 Cl2 118.28(5) . . ? 
C17 O1 C19 115.0(3) . . ? 
C2 O2 C28 116.3(3) . . ? 
C2 N1 N2 106.0(3) . . ? 
C2 N1 C4 128.4(3) . . ? 
N2 N1 C4 123.7(3) . . ? 
C17 N2 N1 105.7(3) . . ? 
C17 N2 C11 130.6(3) . . ? 
N1 N2 C11 123.4(3) . . ? 
C2 C1 C17 100.6(3) . . ? 
C2 C1 Fe1 128.9(3) . . ? 
C17 C1 Fe1 130.0(3) . . ? 
O2 C2 N1 114.1(3) . . ? 
O2 C2 C1 131.9(3) . . ? 
N1 C2 C1 114.0(3) . . ? 
C9 C4 C5 121.2(4) . . ? 
C9 C4 N1 119.2(3) . . ? 
C5 C4 N1 119.6(4) . . ? 
C4 C5 C6 118.3(4) . . ? 
C4 C5 H5 120.8 . . ? 
C6 C5 H5 120.8 . . ? 
C7 C6 C5 120.4(4) . . ? 
C7 C6 H4 119.8 . . ? 
C5 C6 H4 119.8 . . ? 
C6 C7 C8 120.9(4) . . ? 
C6 C7 H3 119.6 . . ? 
C8 C7 H3 119.6 . . ? 
C9 C8 C7 119.1(4) . . ? 
C9 C8 H2 120.4 . . ? 
C7 C8 H2 120.4 . . ? 
C8 C9 C4 120.1(4) . . ? 
C8 C9 H1 120.0 . . ? 
C4 C9 H1 120.0 . . ? 
C12 C11 C16 121.5(4) . . ? 
C12 C11 N2 119.8(4) . . ? 
C16 C11 N2 118.7(4) . . ? 
C11 C12 C13 118.2(4) . . ? 
C11 C12 H10 120.9 . . ? 
C13 C12 H10 120.9 . . ? 
C14 C13 C12 120.7(5) . . ? 
C14 C13 H6 119.6 . . ? 
C12 C13 H6 119.6 . . ? 
C13 C14 C15 120.1(5) . . ? 
C13 C14 H7 119.9 . . ? 
C15 C14 H7 119.9 . . ? 
C14 C15 C16 120.2(5) . . ? 
C14 C15 H8 119.9 . . ? 
C16 C15 H8 119.9 . . ? 
C11 C16 C15 119.3(5) . . ? 
C11 C16 H9 120.4 . . ? 
C15 C16 H9 120.4 . . ? 
O1 C17 N2 114.5(3) . . ? 
O1 C17 C1 131.9(4) . . ? 
N2 C17 C1 113.6(3) . . ? 
C24 C19 C20 123.6(4) . . ? 
C24 C19 O1 118.4(3) . . ? 
C20 C19 O1 117.9(4) . . ? 
C21 C20 C19 116.6(4) . . ? 
C21 C20 C26 121.4(4) . . ? 
C19 C20 C26 122.0(4) . . ? 
C22 C21 C20 121.2(4) . . ? 
C22 C21 H16 119.4 . . ? 
C20 C21 H16 119.4 . . ? 
C21 C22 C23 120.3(4) . . ? 
C21 C22 H15 119.9 . . ? 
C23 C22 H15 119.9 . . ? 
C22 C23 C24 121.3(4) . . ? 
C22 C23 H14 119.3 . . ? 
C24 C23 H14 119.3 . . ? 
C23 C24 C19 117.0(4) . . ? 
C23 C24 C25 121.7(4) . . ? 
C19 C24 C25 121.3(4) . . ? 
C24 C25 H11 109.5 . . ? 
C24 C25 H12 109.5 . . ? 
H11 C25 H12 109.5 . . ? 
C24 C25 H13 109.5 . . ? 
H11 C25 H13 109.5 . . ? 
H12 C25 H13 109.5 . . ? 
C20 C26 H17 109.5 . . ? 
C20 C26 H18 109.5 . . ? 
H17 C26 H18 109.5 . . ? 
C20 C26 H19 109.5 . . ? 
H17 C26 H19 109.5 . . ? 
H18 C26 H19 109.5 . . ? 
C29 C28 C33 124.2(4) . . ? 
C29 C28 O2 118.8(3) . . ? 
C33 C28 O2 116.7(4) . . ? 
C30 C29 C28 116.5(4) . . ? 
C30 C29 C35 122.6(4) . . ? 
C28 C29 C35 120.9(4) . . ? 
C31 C30 C29 121.4(4) . . ? 
C31 C30 H90 119.3 . . ? 
C29 C30 H90 119.3 . . ? 
C30 C31 C32 120.5(4) . . ? 
C30 C31 H26 119.7 . . ? 
C32 C31 H26 119.7 . . ? 
C31 C32 C33 120.8(4) . . ? 
C31 C32 H22 119.6 . . ? 
C33 C32 H22 119.6 . . ? 
C32 C33 C28 116.4(4) . . ? 
C32 C33 C34 122.4(4) . . ? 
C28 C33 C34 121.2(4) . . ? 
C33 C34 H23 109.5 . . ? 
C33 C34 H24 109.5 . . ? 
H23 C34 H24 109.5 . . ? 
C33 C34 H25 109.5 . . ? 
H23 C34 H25 109.5 . . ? 
H24 C34 H25 109.5 . . ? 
C29 C35 H28 109.5 . . ? 
C29 C35 H29 109.5 . . ? 
H28 C35 H29 109.5 . . ? 
C29 C35 H30 109.5 . . ? 
H28 C35 H30 109.5 . . ? 
H29 C35 H30 109.5 . . ? 
C37 C36 H32 109.5 . . ? 
C37 C36 H37 109.5 . . ? 
H32 C36 H37 109.5 . . ? 
C37 C36 H38 109.5 . . ? 
H32 C36 H38 109.5 . . ? 
H37 C36 H38 109.5 . . ? 
C41 C37 C38 118.2(5) . . ? 
C41 C37 C36 121.4(6) . . ? 
C38 C37 C36 120.4(5) . . ? 
C39 C38 C37 121.3(5) . . ? 
C39 C38 H39 119.3 . . ? 
C37 C38 H39 119.3 . . ? 
C40 C39 C38 118.9(5) . . ? 
C40 C39 H34 120.5 . . ? 
C38 C39 H34 120.5 . . ? 
C39 C40 C42 119.7(5) . . ? 
C39 C40 H33 120.1 . . ? 
C42 C40 H33 120.1 . . ? 
C37 C41 C42 121.7(6) . . ? 
C37 C41 H36 119.1 . . ? 
C42 C41 H36 119.1 . . ? 
C41 C42 C40 120.1(5) . . ? 
C41 C42 H35 120.0 . . ? 
C40 C42 H35 120.0 . . ? 
 
loop_ 
 _geom_torsion_atom_site_label_1 
 _geom_torsion_atom_site_label_2 
 _geom_torsion_atom_site_label_3 
 _geom_torsion_atom_site_label_4 
 _geom_torsion 
 _geom_torsion_site_symmetry_1 
 _geom_torsion_site_symmetry_2 
 _geom_torsion_site_symmetry_3 
 _geom_torsion_site_symmetry_4 
 _geom_torsion_publ_flag 
C2 N1 N2 C17 -2.9(4) . . . . ? 
C4 N1 N2 C17 -168.1(3) . . . . ? 
C2 N1 N2 C11 -178.1(3) . . . . ? 
C4 N1 N2 C11 16.7(5) . . . . ? 
Cl1 Fe1 C1 C2 -95.4(3) . . . . ? 
Cl2 Fe1 C1 C2 79.4(3) . . . . ? 
Cl1 Fe1 C1 C17 94.7(3) . . . . ? 
Cl2 Fe1 C1 C17 -90.5(4) . . . . ? 
C28 O2 C2 N1 -164.2(3) . . . . ? 
C28 O2 C2 C1 17.1(6) . . . . ? 
N2 N1 C2 O2 -176.7(3) . . . . ? 
C4 N1 C2 O2 -12.4(6) . . . . ? 
N2 N1 C2 C1 2.2(4) . . . . ? 
C4 N1 C2 C1 166.5(3) . . . . ? 
C17 C1 C2 O2 178.2(4) . . . . ? 
Fe1 C1 C2 O2 6.0(6) . . . . ? 
C17 C1 C2 N1 -0.5(4) . . . . ? 
Fe1 C1 C2 N1 -172.7(3) . . . . ? 
C2 N1 C4 C9 -70.7(5) . . . . ? 
N2 N1 C4 C9 91.1(4) . . . . ? 
C2 N1 C4 C5 107.2(5) . . . . ? 
N2 N1 C4 C5 -91.0(5) . . . . ? 
C9 C4 C5 C6 0.6(6) . . . . ? 
N1 C4 C5 C6 -177.3(3) . . . . ? 
C4 C5 C6 C7 -0.8(6) . . . . ? 
C5 C6 C7 C8 0.5(6) . . . . ? 
C6 C7 C8 C9 0.2(7) . . . . ? 
C7 C8 C9 C4 -0.4(6) . . . . ? 
C5 C4 C9 C8 0.1(6) . . . . ? 
N1 C4 C9 C8 177.9(4) . . . . ? 
C17 N2 C11 C12 -80.6(5) . . . . ? 
N1 N2 C11 C12 93.3(5) . . . . ? 
C17 N2 C11 C16 99.2(5) . . . . ? 
N1 N2 C11 C16 -86.9(5) . . . . ? 
C16 C11 C12 C13 -0.5(6) . . . . ? 
N2 C11 C12 C13 179.3(4) . . . . ? 
C11 C12 C13 C14 0.5(7) . . . . ? 
C12 C13 C14 C15 -0.4(8) . . . . ? 
C13 C14 C15 C16 0.2(8) . . . . ? 
C12 C11 C16 C15 0.3(7) . . . . ? 
N2 C11 C16 C15 -179.5(4) . . . . ? 
C14 C15 C16 C11 -0.1(8) . . . . ? 
C19 O1 C17 N2 175.7(3) . . . . ? 
C19 O1 C17 C1 -4.5(6) . . . . ? 
N1 N2 C17 O1 -177.3(3) . . . . ? 
C11 N2 C17 O1 -2.7(6) . . . . ? 
N1 N2 C17 C1 2.8(4) . . . . ? 
C11 N2 C17 C1 177.5(4) . . . . ? 
C2 C1 C17 O1 178.7(4) . . . . ? 
Fe1 C1 C17 O1 -9.2(6) . . . . ? 
C2 C1 C17 N2 -1.5(4) . . . . ? 
Fe1 C1 C17 N2 170.6(3) . . . . ? 
C17 O1 C19 C24 -84.7(4) . . . . ? 
C17 O1 C19 C20 98.7(4) . . . . ? 
C24 C19 C20 C21 0.3(6) . . . . ? 
O1 C19 C20 C21 176.7(3) . . . . ? 
C24 C19 C20 C26 179.5(4) . . . . ? 
O1 C19 C20 C26 -4.1(5) . . . . ? 
C19 C20 C21 C22 -0.6(6) . . . . ? 
C26 C20 C21 C22 -179.7(4) . . . . ? 
C20 C21 C22 C23 0.7(6) . . . . ? 
C21 C22 C23 C24 -0.5(6) . . . . ? 
C22 C23 C24 C19 0.2(6) . . . . ? 
C22 C23 C24 C25 178.4(4) . . . . ? 
C20 C19 C24 C23 -0.1(6) . . . . ? 
O1 C19 C24 C23 -176.5(3) . . . . ? 
C20 C19 C24 C25 -178.3(4) . . . . ? 
O1 C19 C24 C25 5.3(5) . . . . ? 
C2 O2 C28 C29 77.2(4) . . . . ? 
C2 O2 C28 C33 -109.2(4) . . . . ? 
C33 C28 C29 C30 3.6(6) . . . . ? 
O2 C28 C29 C30 176.7(3) . . . . ? 
C33 C28 C29 C35 -175.5(4) . . . . ? 
O2 C28 C29 C35 -2.5(5) . . . . ? 
C28 C29 C30 C31 -1.2(6) . . . . ? 
C35 C29 C30 C31 178.0(4) . . . . ? 
C29 C30 C31 C32 -0.9(6) . . . . ? 
C30 C31 C32 C33 0.7(6) . . . . ? 
C31 C32 C33 C28 1.6(6) . . . . ? 
C31 C32 C33 C34 -178.3(4) . . . . ? 
C29 C28 C33 C32 -3.8(6) . . . . ? 
O2 C28 C33 C32 -177.0(3) . . . . ? 
C29 C28 C33 C34 176.0(4) . . . . ? 
O2 C28 C33 C34 2.8(5) . . . . ? 
C41 C37 C38 C39 1.5(8) . . . . ? 
C36 C37 C38 C39 -178.4(5) . . . . ? 
C37 C38 C39 C40 -0.6(8) . . . . ? 
C38 C39 C40 C42 -1.3(8) . . . . ? 
C38 C37 C41 C42 -0.7(8) . . . . ? 
C36 C37 C41 C42 179.3(5) . . . . ? 
C37 C41 C42 C40 -1.2(9) . . . . ? 
C39 C40 C42 C41 2.1(9) . . . . ? 
 
_diffrn_measured_fraction_theta_max    0.999 
_diffrn_reflns_theta_full              25.00 
_diffrn_measured_fraction_theta_full   0.999 
_refine_diff_density_max    0.315 
_refine_diff_density_min   -0.327 
_refine_diff_density_rms    0.069 

#===end

data_cp018_0m 
 
_audit_creation_method            SHELXL-97 
_chemical_name_systematic 
; 
 ? 
; 
_chemical_name_common             ? 
_chemical_melting_point           ? 
_chemical_formula_moiety          ? 
_chemical_formula_sum 
 'C45 H42 Fe N2 O2' 
_chemical_formula_weight          698.66 
 
loop_ 
 _atom_type_symbol 
 _atom_type_description 
 _atom_type_scat_dispersion_real 
 _atom_type_scat_dispersion_imag 
 _atom_type_scat_source 
 'C'  'C'   0.0033   0.0016 
 'International Tables Vol C Tables 4.2.6.8 and 6.1.1.4' 
 'H'  'H'   0.0000   0.0000 
 'International Tables Vol C Tables 4.2.6.8 and 6.1.1.4' 
 'Fe'  'Fe'   0.3463   0.8444 
 'International Tables Vol C Tables 4.2.6.8 and 6.1.1.4' 
 'N'  'N'   0.0061   0.0033 
 'International Tables Vol C Tables 4.2.6.8 and 6.1.1.4' 
 'O'  'O'   0.0106   0.0060 
 'International Tables Vol C Tables 4.2.6.8 and 6.1.1.4' 
 
_symmetry_cell_setting            Orthorhombic 
_symmetry_space_group_name_H-M    Pbca 
 
loop_ 
 _symmetry_equiv_pos_as_xyz 
 'x, y, z' 
 '-x+1/2, -y, z+1/2' 
 'x+1/2, -y+1/2, -z' 
 '-x, y+1/2, -z+1/2' 
 '-x, -y, -z' 
 'x-1/2, y, -z-1/2' 
 '-x-1/2, y-1/2, z' 
 'x, -y-1/2, z-1/2' 
 
_cell_length_a                    20.1797(11) 
_cell_length_b                    17.4954(10) 
_cell_length_c                    20.3989(11) 
_cell_angle_alpha                 90.00 
_cell_angle_beta                  90.00 
_cell_angle_gamma                 90.00 
_cell_volume                      7201.9(7) 
_cell_formula_units_Z             8 
_cell_measurement_temperature     150(2) 
_cell_measurement_reflns_used     ? 
_cell_measurement_theta_min       ? 
_cell_measurement_theta_max       ? 
 
_exptl_crystal_description        Block 
_exptl_crystal_colour             Yellow
_exptl_crystal_size_max           0.2 
_exptl_crystal_size_mid           0.2 
_exptl_crystal_size_min           0.2 
_exptl_crystal_density_meas       ? 
_exptl_crystal_density_diffrn     1.289 
_exptl_crystal_density_method     'not measured' 
_exptl_crystal_F_000              2944 
_exptl_absorpt_coefficient_mu     0.460 
_exptl_absorpt_correction_type    multi-scan 
_exptl_absorpt_correction_T_min   0.7128
_exptl_absorpt_correction_T_max   0.7456 
_exptl_absorpt_process_details    SADABS 
 
_exptl_special_details 
; 
 ? 
; 
 
_diffrn_ambient_temperature       150(2) 
_diffrn_radiation_wavelength      0.71073 
_diffrn_radiation_type            MoK\a 
_diffrn_radiation_source          'fine-focus sealed tube' 
_diffrn_radiation_monochromator   graphite 
_diffrn_measurement_device_type   ? 
_diffrn_measurement_method        ? 
_diffrn_detector_area_resol_mean  ? 
_diffrn_reflns_number             62770 
_diffrn_reflns_av_R_equivalents   0.0669 
_diffrn_reflns_av_sigmaI/netI     0.0438 
_diffrn_reflns_limit_h_min        -26 
_diffrn_reflns_limit_h_max        20 
_diffrn_reflns_limit_k_min        -21 
_diffrn_reflns_limit_k_max        22 
_diffrn_reflns_limit_l_min        -26 
_diffrn_reflns_limit_l_max        26 
_diffrn_reflns_theta_min          1.84 
_diffrn_reflns_theta_max          27.53 
_reflns_number_total              8290 
_reflns_number_gt                 5913 
_reflns_threshold_expression      >2sigma(I) 
 
_computing_data_collection        ? 
_computing_cell_refinement        ? 
_computing_data_reduction         ? 
_computing_structure_solution     'SHELXS-97 (Sheldrick, 2008)' 
_computing_structure_refinement   'SHELXL-97 (Sheldrick, 2008)' 
_computing_molecular_graphics     ? 
_computing_publication_material   ? 
 
_refine_special_details 
; 
 Refinement of F^2^ against ALL reflections.  The weighted R-factor wR and 
 goodness of fit S are based on F^2^, conventional R-factors R are based 
 on F, with F set to zero for negative F^2^. The threshold expression of 
 F^2^ > 2sigma(F^2^) is used only for calculating R-factors(gt) etc. and is 
 not relevant to the choice of reflections for refinement.  R-factors based 
 on F^2^ are statistically about twice as large as those based on F, and R- 
 factors based on ALL data will be even larger. 
; 
 
_refine_ls_structure_factor_coef  Fsqd  
_refine_ls_matrix_type            full 
_refine_ls_weighting_scheme       calc  
_refine_ls_weighting_details 
 'calc w=1/[\s^2^(Fo^2^)+(0.0322P)^2^+3.1967P] where P=(Fo^2^+2Fc^2^)/3' 
_atom_sites_solution_primary      direct 
_atom_sites_solution_secondary    difmap 
_atom_sites_solution_hydrogens    geom 
_refine_ls_hydrogen_treatment     constr 
_refine_ls_extinction_method      none 
_refine_ls_extinction_coef        ? 
_refine_ls_number_reflns          8290 
_refine_ls_number_parameters      455 
_refine_ls_number_restraints      0 
_refine_ls_R_factor_all           0.0677 
_refine_ls_R_factor_gt            0.0384 
_refine_ls_wR_factor_ref          0.0881 
_refine_ls_wR_factor_gt           0.0778 
_refine_ls_goodness_of_fit_ref    1.007 
_refine_ls_restrained_S_all       1.007 
_refine_ls_shift/su_max           0.001 
_refine_ls_shift/su_mean          0.000 
 
loop_ 
 _atom_site_label 
 _atom_site_type_symbol 
 _atom_site_fract_x 
 _atom_site_fract_y 
 _atom_site_fract_z 
 _atom_site_U_iso_or_equiv 
 _atom_site_adp_type 
 _atom_site_occupancy 
 _atom_site_symmetry_multiplicity 
 _atom_site_calc_flag 
 _atom_site_refinement_flags 
 _atom_site_disorder_assembly 
 _atom_site_disorder_group 
Fe1 Fe 0.088974(12) 0.358381(14) 0.330621(12) 0.01980(7) Uani 1 1 d . . . 
O1 O 0.15192(6) 0.25655(7) 0.47716(6) 0.0263(3) Uani 1 1 d . . . 
O2 O 0.22506(6) 0.49025(7) 0.37849(6) 0.0288(3) Uani 1 1 d . . . 
N1 N 0.22545(7) 0.35104(8) 0.49603(7) 0.0214(3) Uani 1 1 d . . . 
N2 N 0.25005(7) 0.41574(8) 0.46481(7) 0.0223(3) Uani 1 1 d . . . 
C1 C 0.16451(8) 0.36826(9) 0.40128(8) 0.0183(4) Uani 1 1 d . . . 
C2 C 0.17771(8) 0.32310(10) 0.45583(8) 0.0195(4) Uani 1 1 d . . . 
C3 C 0.11436(9) 0.21138(10) 0.43327(9) 0.0228(4) Uani 1 1 d . . . 
C4 C 0.04793(9) 0.20175(10) 0.44902(9) 0.0265(4) Uani 1 1 d . . . 
C5 C 0.01197(11) 0.15229(11) 0.40905(11) 0.0351(5) Uani 1 1 d . . . 
H6 H -0.0330 0.1451 0.4170 0.042 Uiso 1 1 calc R . . 
C6 C 0.04158(11) 0.11399(12) 0.35806(11) 0.0404(6) Uani 1 1 d . . . 
H5 H 0.0166 0.0814 0.3318 0.049 Uiso 1 1 calc R . . 
C7 C 0.10824(12) 0.12378(12) 0.34570(10) 0.0389(5) Uani 1 1 d . . . 
H4 H 0.1279 0.0968 0.3116 0.047 Uiso 1 1 calc R . . 
C8 C 0.14654(10) 0.17311(11) 0.38319(10) 0.0288(4) Uani 1 1 d . . . 
C9 C 0.21973(11) 0.18206(13) 0.37077(12) 0.0427(6) Uani 1 1 d . . . 
H1 H 0.2437 0.1725 0.4106 0.064 Uiso 1 1 calc R . . 
H2 H 0.2287 0.2331 0.3560 0.064 Uiso 1 1 calc R . . 
H3 H 0.2335 0.1463 0.3378 0.064 Uiso 1 1 calc R . . 
C10 C 0.01758(10) 0.24139(12) 0.50682(10) 0.0357(5) Uani 1 1 d . . . 
H7 H 0.0397 0.2255 0.5462 0.054 Uiso 1 1 calc R . . 
H8 H -0.0286 0.2284 0.5096 0.054 Uiso 1 1 calc R . . 
H9 H 0.0221 0.2957 0.5017 0.054 Uiso 1 1 calc R . . 
C11 C 0.28669(9) 0.47389(10) 0.49933(8) 0.0210(4) Uani 1 1 d . . . 
C12 C 0.25346(10) 0.53502(11) 0.52621(9) 0.0302(4) Uani 1 1 d . . . 
H14 H 0.2074 0.5374 0.5246 0.036 Uiso 1 1 calc R . . 
C13 C 0.28950(12) 0.59284(12) 0.55571(10) 0.0383(5) Uani 1 1 d . . . 
H13 H 0.2678 0.6349 0.5735 0.046 Uiso 1 1 calc R . . 
C14 C 0.35729(11) 0.58817(12) 0.55871(10) 0.0359(5) Uani 1 1 d . . . 
H12 H 0.3813 0.6271 0.5787 0.043 Uiso 1 1 calc R . . 
C15 C 0.39005(10) 0.52655(13) 0.53252(10) 0.0374(5) Uani 1 1 d . . . 
H10 H 0.4360 0.5236 0.5353 0.045 Uiso 1 1 calc R . . 
C16 C 0.35469(9) 0.46864(12) 0.50189(9) 0.0296(4) Uani 1 1 d . . . 
H11 H 0.3765 0.4271 0.4834 0.036 Uiso 1 1 calc R . . 
C17 C 0.21111(9) 0.42568(10) 0.41102(8) 0.0202(4) Uani 1 1 d . . . 
C18 C 0.19017(9) 0.50752(10) 0.32022(8) 0.0205(4) Uani 1 1 d . . . 
C19 C 0.13240(9) 0.54984(10) 0.32575(9) 0.0227(4) Uani 1 1 d . . . 
C20 C 0.10377(10) 0.57421(11) 0.26748(9) 0.0279(4) Uani 1 1 d . . . 
H20 H 0.0643 0.6015 0.2686 0.034 Uiso 1 1 calc R . . 
C21 C 0.13304(10) 0.55849(11) 0.20801(9) 0.0319(5) Uani 1 1 d . . . 
H19 H 0.1137 0.5764 0.1696 0.038 Uiso 1 1 calc R . . 
C22 C 0.19064(10) 0.51653(12) 0.20496(9) 0.0322(5) Uani 1 1 d . . . 
H18 H 0.2097 0.5064 0.1644 0.039 Uiso 1 1 calc R . . 
C23 C 0.22059(9) 0.48917(10) 0.26143(9) 0.0262(4) Uani 1 1 d . . . 
C24 C 0.28238(11) 0.44154(13) 0.25906(12) 0.0448(6) Uani 1 1 d . . . 
H15 H 0.3009 0.4435 0.2157 0.067 Uiso 1 1 calc R . . 
H16 H 0.2718 0.3896 0.2700 0.067 Uiso 1 1 calc R . . 
H17 H 0.3140 0.4611 0.2899 0.067 Uiso 1 1 calc R . . 
C25 C 0.10332(10) 0.56972(12) 0.39133(9) 0.0330(5) Uani 1 1 d . . . 
H21 H 0.1349 0.5988 0.4162 0.050 Uiso 1 1 calc R . . 
H22 H 0.0927 0.5236 0.4146 0.050 Uiso 1 1 calc R . . 
H23 H 0.0638 0.5994 0.3852 0.050 Uiso 1 1 calc R . . 
C26 C 0.26355(9) 0.31078(10) 0.54475(9) 0.0227(4) Uani 1 1 d . . . 
C27 C 0.31463(10) 0.26414(12) 0.52530(11) 0.0349(5) Uani 1 1 d . . . 
H28 H 0.3255 0.2597 0.4812 0.042 Uiso 1 1 calc R . . 
C28 C 0.34970(11) 0.22373(14) 0.57225(12) 0.0454(6) Uani 1 1 d . . . 
H24 H 0.3843 0.1918 0.5597 0.054 Uiso 1 1 calc R . . 
C29 C 0.33317(10) 0.23087(13) 0.63783(11) 0.0411(6) Uani 1 1 d . . . 
H25 H 0.3567 0.2038 0.6694 0.049 Uiso 1 1 calc R . . 
C30 C 0.28256(12) 0.27738(14) 0.65619(11) 0.0474(6) Uani 1 1 d . . . 
H26 H 0.2716 0.2819 0.7003 0.057 Uiso 1 1 calc R . . 
C31 C 0.24707(11) 0.31827(13) 0.60955(9) 0.0371(5) Uani 1 1 d . . . 
H27 H 0.2126 0.3503 0.6222 0.045 Uiso 1 1 calc R . . 
C32 C -0.01039(9) 0.37016(11) 0.35612(10) 0.0284(4) Uani 1 1 d . . . 
H32A H -0.0363 0.3478 0.3210 0.034 Uiso 1 1 calc R . . 
H32B H -0.0178 0.3389 0.3947 0.034 Uiso 1 1 calc R . . 
C33 C -0.03873(9) 0.44611(11) 0.36983(9) 0.0241(4) Uani 1 1 d . . . 
C34 C -0.05092(9) 0.47194(12) 0.43359(9) 0.0297(4) Uani 1 1 d . . . 
H33 H -0.0436 0.4388 0.4685 0.036 Uiso 1 1 calc R . . 
C35 C -0.07342(10) 0.54509(13) 0.44645(10) 0.0374(5) Uani 1 1 d . . . 
H32 H -0.0803 0.5604 0.4896 0.045 Uiso 1 1 calc R . . 
C36 C -0.08579(10) 0.59533(13) 0.39616(11) 0.0390(5) Uani 1 1 d . . . 
H31 H -0.1001 0.6448 0.4048 0.047 Uiso 1 1 calc R . . 
C37 C -0.07647(10) 0.57067(13) 0.33234(11) 0.0388(5) Uani 1 1 d . . . 
H30 H -0.0858 0.6036 0.2978 0.047 Uiso 1 1 calc R . . 
C38 C -0.05361(9) 0.49799(12) 0.31930(10) 0.0318(5) Uani 1 1 d . . . 
H29 H -0.0479 0.4829 0.2760 0.038 Uiso 1 1 calc R . . 
C39 C 0.10175(9) 0.32072(12) 0.23413(9) 0.0288(4) Uani 1 1 d . . . 
H39A H 0.1340 0.3525 0.2119 0.035 Uiso 1 1 calc R . . 
H39B H 0.1177 0.2684 0.2339 0.035 Uiso 1 1 calc R . . 
C40 C 0.03701(9) 0.32538(11) 0.20033(8) 0.0235(4) Uani 1 1 d . . . 
C41 C -0.00826(10) 0.26519(11) 0.20147(9) 0.0301(4) Uani 1 1 d . . . 
H38 H 0.0041 0.2192 0.2208 0.036 Uiso 1 1 calc R . . 
C42 C -0.07103(10) 0.27180(12) 0.17463(10) 0.0342(5) Uani 1 1 d . . . 
H37 H -0.1001 0.2307 0.1767 0.041 Uiso 1 1 calc R . . 
C43 C -0.09075(10) 0.33893(12) 0.14486(10) 0.0330(5) Uani 1 1 d . . . 
H36 H -0.1328 0.3433 0.1266 0.040 Uiso 1 1 calc R . . 
C44 C -0.04697(10) 0.39929(12) 0.14278(10) 0.0315(5) Uani 1 1 d . . . 
H35 H -0.0596 0.4448 0.1229 0.038 Uiso 1 1 calc R . . 
C45 C 0.01551(10) 0.39288(11) 0.17000(9) 0.0276(4) Uani 1 1 d . . . 
H34 H 0.0441 0.4345 0.1681 0.033 Uiso 1 1 calc R . . 
 
loop_ 
 _atom_site_aniso_label 
 _atom_site_aniso_U_11 
 _atom_site_aniso_U_22 
 _atom_site_aniso_U_33 
 _atom_site_aniso_U_23 
 _atom_site_aniso_U_13 
 _atom_site_aniso_U_12 
Fe1 0.01757(13) 0.02337(14) 0.01844(12) -0.00062(11) -0.00349(10) -0.00100(11) 
O1 0.0326(7) 0.0213(7) 0.0249(7) 0.0060(5) -0.0111(6) -0.0104(6) 
O2 0.0337(8) 0.0241(7) 0.0286(7) 0.0103(6) -0.0143(6) -0.0126(6) 
N1 0.0235(8) 0.0172(7) 0.0234(7) 0.0048(6) -0.0074(6) -0.0041(6) 
N2 0.0250(8) 0.0181(8) 0.0238(8) 0.0037(6) -0.0086(6) -0.0064(6) 
C1 0.0190(9) 0.0157(9) 0.0201(8) -0.0006(7) -0.0021(7) -0.0001(7) 
C2 0.0201(9) 0.0159(9) 0.0226(9) -0.0009(7) -0.0017(7) -0.0014(7) 
C3 0.0299(10) 0.0130(9) 0.0257(9) 0.0036(7) -0.0112(8) -0.0036(8) 
C4 0.0299(11) 0.0189(9) 0.0306(10) 0.0073(8) -0.0073(8) -0.0033(8) 
C5 0.0324(11) 0.0241(11) 0.0487(13) 0.0049(10) -0.0147(10) -0.0078(9) 
C6 0.0490(14) 0.0241(11) 0.0482(13) -0.0046(10) -0.0250(11) -0.0049(10) 
C7 0.0572(15) 0.0245(11) 0.0350(12) -0.0067(9) -0.0104(10) 0.0078(10) 
C8 0.0352(11) 0.0185(9) 0.0326(11) 0.0045(8) -0.0060(9) 0.0028(8) 
C9 0.0398(13) 0.0373(13) 0.0511(14) -0.0002(11) 0.0060(11) 0.0093(10) 
C10 0.0329(11) 0.0378(12) 0.0364(12) 0.0061(10) 0.0016(10) -0.0020(10) 
C11 0.0232(9) 0.0196(9) 0.0202(9) 0.0044(7) -0.0059(7) -0.0064(7) 
C12 0.0306(11) 0.0265(11) 0.0336(11) -0.0003(9) -0.0101(9) 0.0014(9) 
C13 0.0588(15) 0.0232(11) 0.0330(11) -0.0016(9) -0.0121(11) 0.0027(10) 
C14 0.0509(14) 0.0294(11) 0.0273(10) 0.0050(9) -0.0132(10) -0.0197(10) 
C15 0.0275(11) 0.0527(14) 0.0321(11) 0.0015(10) -0.0053(9) -0.0176(10) 
C16 0.0263(10) 0.0363(11) 0.0263(10) -0.0028(9) -0.0025(8) -0.0041(9) 
C17 0.0214(9) 0.0192(9) 0.0198(9) 0.0026(7) -0.0034(7) 0.0005(7) 
C18 0.0237(9) 0.0185(9) 0.0193(9) 0.0045(7) -0.0065(7) -0.0067(7) 
C19 0.0241(9) 0.0211(9) 0.0230(9) -0.0003(8) 0.0008(8) -0.0055(8) 
C20 0.0272(11) 0.0250(10) 0.0317(10) 0.0023(9) -0.0054(8) 0.0017(8) 
C21 0.0397(12) 0.0331(11) 0.0228(10) 0.0068(8) -0.0098(9) -0.0041(10) 
C22 0.0417(12) 0.0341(12) 0.0206(9) -0.0034(8) 0.0050(9) -0.0069(10) 
C23 0.0250(10) 0.0215(10) 0.0323(10) -0.0018(8) 0.0010(8) -0.0022(8) 
C24 0.0349(13) 0.0417(13) 0.0578(15) -0.0061(12) 0.0039(11) 0.0060(10) 
C25 0.0368(12) 0.0357(12) 0.0267(10) -0.0012(9) 0.0051(9) -0.0033(9) 
C26 0.0217(9) 0.0193(9) 0.0271(9) 0.0052(8) -0.0096(8) -0.0036(7) 
C27 0.0258(10) 0.0426(13) 0.0363(11) 0.0093(10) 0.0005(9) 0.0052(9) 
C28 0.0274(11) 0.0491(14) 0.0597(15) 0.0164(12) -0.0034(11) 0.0112(10) 
C29 0.0304(12) 0.0450(14) 0.0481(14) 0.0229(11) -0.0178(10) -0.0032(10) 
C30 0.0527(15) 0.0621(17) 0.0274(11) 0.0083(11) -0.0108(10) 0.0052(13) 
C31 0.0416(13) 0.0437(13) 0.0260(10) -0.0017(9) -0.0087(9) 0.0111(10) 
C32 0.0218(10) 0.0339(11) 0.0295(10) -0.0039(9) 0.0011(8) -0.0049(8) 
C33 0.0164(9) 0.0324(11) 0.0234(9) -0.0027(8) 0.0014(7) -0.0051(8) 
C34 0.0281(11) 0.0370(12) 0.0240(10) -0.0014(9) 0.0043(8) -0.0025(9) 
C35 0.0363(12) 0.0475(14) 0.0284(11) -0.0117(10) 0.0079(9) -0.0030(10) 
C36 0.0322(12) 0.0352(12) 0.0495(13) -0.0087(10) 0.0008(11) 0.0041(10) 
C37 0.0350(12) 0.0435(13) 0.0380(12) 0.0045(11) -0.0071(10) 0.0050(10) 
C38 0.0280(11) 0.0434(13) 0.0240(10) -0.0012(9) -0.0019(8) -0.0001(9) 
C39 0.0269(11) 0.0357(11) 0.0239(9) -0.0052(8) 0.0002(8) 0.0009(9) 
C40 0.0269(10) 0.0279(10) 0.0158(8) -0.0049(8) 0.0028(7) -0.0009(8) 
C41 0.0373(12) 0.0233(10) 0.0296(10) 0.0003(8) -0.0065(9) -0.0015(9) 
C42 0.0351(11) 0.0304(11) 0.0370(11) -0.0031(9) -0.0046(10) -0.0093(9) 
C43 0.0292(11) 0.0379(12) 0.0318(10) -0.0091(9) -0.0067(9) 0.0036(9) 
C44 0.0394(12) 0.0270(11) 0.0280(10) -0.0005(9) -0.0050(9) 0.0052(9) 
C45 0.0337(11) 0.0279(10) 0.0212(9) -0.0022(8) 0.0009(9) -0.0057(9) 
 
_geom_special_details 
; 
 All esds (except the esd in the dihedral angle between two l.s. planes) 
 are estimated using the full covariance matrix.  The cell esds are taken 
 into account individually in the estimation of esds in distances, angles 
 and torsion angles; correlations between esds in cell parameters are only 
 used when they are defined by crystal symmetry.  An approximate (isotropic) 
 treatment of cell esds is used for estimating esds involving l.s. planes. 
; 
 
loop_ 
 _geom_bond_atom_site_label_1 
 _geom_bond_atom_site_label_2 
 _geom_bond_distance 
 _geom_bond_site_symmetry_2 
 _geom_bond_publ_flag 
Fe1 C32 2.0817(18) . ? 
Fe1 C39 2.0915(18) . ? 
Fe1 C1 2.1049(17) . ? 
O1 C2 1.347(2) . ? 
O1 C3 1.414(2) . ? 
O2 C17 1.340(2) . ? 
O2 C18 1.414(2) . ? 
N1 C2 1.356(2) . ? 
N1 N2 1.390(2) . ? 
N1 C26 1.441(2) . ? 
N2 C17 1.361(2) . ? 
N2 C11 1.441(2) . ? 
C1 C17 1.390(2) . ? 
C1 C2 1.390(2) . ? 
C3 C8 1.383(3) . ? 
C3 C4 1.389(3) . ? 
C4 C5 1.393(3) . ? 
C4 C10 1.499(3) . ? 
C5 C6 1.374(3) . ? 
C5 H6 0.9300 . ? 
C6 C7 1.379(3) . ? 
C6 H5 0.9300 . ? 
C7 C8 1.388(3) . ? 
C7 H4 0.9300 . ? 
C8 C9 1.507(3) . ? 
C9 H1 0.9600 . ? 
C9 H2 0.9600 . ? 
C9 H3 0.9600 . ? 
C10 H7 0.9600 . ? 
C10 H8 0.9600 . ? 
C10 H9 0.9600 . ? 
C11 C16 1.376(2) . ? 
C11 C12 1.376(3) . ? 
C12 C13 1.384(3) . ? 
C12 H14 0.9300 . ? 
C13 C14 1.372(3) . ? 
C13 H13 0.9300 . ? 
C14 C15 1.373(3) . ? 
C14 H12 0.9300 . ? 
C15 C16 1.388(3) . ? 
C15 H10 0.9300 . ? 
C16 H11 0.9300 . ? 
C18 C23 1.385(2) . ? 
C18 C19 1.386(2) . ? 
C19 C20 1.389(2) . ? 
C19 C25 1.502(3) . ? 
C20 C21 1.377(3) . ? 
C20 H20 0.9300 . ? 
C21 C22 1.376(3) . ? 
C21 H19 0.9300 . ? 
C22 C23 1.386(3) . ? 
C22 H18 0.9300 . ? 
C23 C24 1.501(3) . ? 
C24 H15 0.9600 . ? 
C24 H16 0.9600 . ? 
C24 H17 0.9600 . ? 
C25 H21 0.9600 . ? 
C25 H22 0.9600 . ? 
C25 H23 0.9600 . ? 
C26 C31 1.369(3) . ? 
C26 C27 1.373(3) . ? 
C27 C28 1.385(3) . ? 
C27 H28 0.9300 . ? 
C28 C29 1.384(3) . ? 
C28 H24 0.9300 . ? 
C29 C30 1.358(3) . ? 
C29 H25 0.9300 . ? 
C30 C31 1.389(3) . ? 
C30 H26 0.9300 . ? 
C31 H27 0.9300 . ? 
C32 C33 1.474(3) . ? 
C32 H32A 0.9700 . ? 
C32 H32B 0.9700 . ? 
C33 C34 1.399(3) . ? 
C33 C38 1.406(3) . ? 
C34 C35 1.383(3) . ? 
C34 H33 0.9300 . ? 
C35 C36 1.374(3) . ? 
C35 H32 0.9300 . ? 
C36 C37 1.384(3) . ? 
C36 H31 0.9300 . ? 
C37 C38 1.378(3) . ? 
C37 H30 0.9300 . ? 
C38 H29 0.9300 . ? 
C39 C40 1.480(3) . ? 
C39 H39A 0.9700 . ? 
C39 H39B 0.9700 . ? 
C40 C41 1.394(3) . ? 
C40 C45 1.402(3) . ? 
C41 C42 1.385(3) . ? 
C41 H38 0.9300 . ? 
C42 C43 1.381(3) . ? 
C42 H37 0.9300 . ? 
C43 C44 1.377(3) . ? 
C43 H36 0.9300 . ? 
C44 C45 1.382(3) . ? 
C44 H35 0.9300 . ? 
C45 H34 0.9300 . ? 
 
loop_ 
 _geom_angle_atom_site_label_1 
 _geom_angle_atom_site_label_2 
 _geom_angle_atom_site_label_3 
 _geom_angle 
 _geom_angle_site_symmetry_1 
 _geom_angle_site_symmetry_3 
 _geom_angle_publ_flag 
C32 Fe1 C39 112.65(7) . . ? 
C32 Fe1 C1 121.21(7) . . ? 
C39 Fe1 C1 125.52(7) . . ? 
C2 O1 C3 119.04(13) . . ? 
C17 O2 C18 119.45(13) . . ? 
C2 N1 N2 105.67(13) . . ? 
C2 N1 C26 128.32(14) . . ? 
N2 N1 C26 121.57(14) . . ? 
C17 N2 N1 105.50(13) . . ? 
C17 N2 C11 126.87(14) . . ? 
N1 N2 C11 122.27(14) . . ? 
C17 C1 C2 99.59(14) . . ? 
C17 C1 Fe1 130.31(12) . . ? 
C2 C1 Fe1 129.80(13) . . ? 
O1 C2 N1 112.99(14) . . ? 
O1 C2 C1 132.48(16) . . ? 
N1 C2 C1 114.53(15) . . ? 
C8 C3 C4 124.42(17) . . ? 
C8 C3 O1 119.10(17) . . ? 
C4 C3 O1 116.02(16) . . ? 
C3 C4 C5 116.29(19) . . ? 
C3 C4 C10 121.35(17) . . ? 
C5 C4 C10 122.35(18) . . ? 
C6 C5 C4 121.3(2) . . ? 
C6 C5 H6 119.3 . . ? 
C4 C5 H6 119.3 . . ? 
C5 C6 C7 120.12(19) . . ? 
C5 C6 H5 119.9 . . ? 
C7 C6 H5 119.9 . . ? 
C6 C7 C8 121.3(2) . . ? 
C6 C7 H4 119.4 . . ? 
C8 C7 H4 119.4 . . ? 
C3 C8 C7 116.51(19) . . ? 
C3 C8 C9 122.28(18) . . ? 
C7 C8 C9 121.18(19) . . ? 
C8 C9 H1 109.5 . . ? 
C8 C9 H2 109.5 . . ? 
H1 C9 H2 109.5 . . ? 
C8 C9 H3 109.5 . . ? 
H1 C9 H3 109.5 . . ? 
H2 C9 H3 109.5 . . ? 
C4 C10 H7 109.5 . . ? 
C4 C10 H8 109.5 . . ? 
H7 C10 H8 109.5 . . ? 
C4 C10 H9 109.5 . . ? 
H7 C10 H9 109.5 . . ? 
H8 C10 H9 109.5 . . ? 
C16 C11 C12 121.51(18) . . ? 
C16 C11 N2 118.88(17) . . ? 
C12 C11 N2 119.55(16) . . ? 
C11 C12 C13 119.03(19) . . ? 
C11 C12 H14 120.5 . . ? 
C13 C12 H14 120.5 . . ? 
C14 C13 C12 120.0(2) . . ? 
C14 C13 H13 120.0 . . ? 
C12 C13 H13 120.0 . . ? 
C13 C14 C15 120.64(19) . . ? 
C13 C14 H12 119.7 . . ? 
C15 C14 H12 119.7 . . ? 
C14 C15 C16 120.06(19) . . ? 
C14 C15 H10 120.0 . . ? 
C16 C15 H10 120.0 . . ? 
C11 C16 C15 118.75(19) . . ? 
C11 C16 H11 120.6 . . ? 
C15 C16 H11 120.6 . . ? 
O2 C17 N2 112.68(15) . . ? 
O2 C17 C1 132.88(15) . . ? 
N2 C17 C1 114.42(15) . . ? 
C23 C18 C19 124.55(16) . . ? 
C23 C18 O2 117.23(16) . . ? 
C19 C18 O2 117.69(16) . . ? 
C18 C19 C20 116.38(17) . . ? 
C18 C19 C25 121.67(16) . . ? 
C20 C19 C25 121.93(17) . . ? 
C21 C20 C19 120.95(18) . . ? 
C21 C20 H20 119.5 . . ? 
C19 C20 H20 119.5 . . ? 
C22 C21 C20 120.58(18) . . ? 
C22 C21 H19 119.7 . . ? 
C20 C21 H19 119.7 . . ? 
C21 C22 C23 121.00(18) . . ? 
C21 C22 H18 119.5 . . ? 
C23 C22 H18 119.5 . . ? 
C18 C23 C22 116.51(17) . . ? 
C18 C23 C24 121.66(18) . . ? 
C22 C23 C24 121.83(18) . . ? 
C23 C24 H15 109.5 . . ? 
C23 C24 H16 109.5 . . ? 
H15 C24 H16 109.5 . . ? 
C23 C24 H17 109.5 . . ? 
H15 C24 H17 109.5 . . ? 
H16 C24 H17 109.5 . . ? 
C19 C25 H21 109.5 . . ? 
C19 C25 H22 109.5 . . ? 
H21 C25 H22 109.5 . . ? 
C19 C25 H23 109.5 . . ? 
H21 C25 H23 109.5 . . ? 
H22 C25 H23 109.5 . . ? 
C31 C26 C27 121.21(18) . . ? 
C31 C26 N1 119.31(17) . . ? 
C27 C26 N1 119.46(17) . . ? 
C26 C27 C28 119.1(2) . . ? 
C26 C27 H28 120.4 . . ? 
C28 C27 H28 120.4 . . ? 
C29 C28 C27 119.9(2) . . ? 
C29 C28 H24 120.0 . . ? 
C27 C28 H24 120.0 . . ? 
C30 C29 C28 120.1(2) . . ? 
C30 C29 H25 119.9 . . ? 
C28 C29 H25 119.9 . . ? 
C29 C30 C31 120.5(2) . . ? 
C29 C30 H26 119.8 . . ? 
C31 C30 H26 119.8 . . ? 
C26 C31 C30 119.1(2) . . ? 
C26 C31 H27 120.4 . . ? 
C30 C31 H27 120.4 . . ? 
C33 C32 Fe1 120.70(13) . . ? 
C33 C32 H32A 107.2 . . ? 
Fe1 C32 H32A 107.2 . . ? 
C33 C32 H32B 107.2 . . ? 
Fe1 C32 H32B 107.2 . . ? 
H32A C32 H32B 106.8 . . ? 
C34 C33 C38 115.83(18) . . ? 
C34 C33 C32 122.41(18) . . ? 
C38 C33 C32 121.74(17) . . ? 
C35 C34 C33 122.21(19) . . ? 
C35 C34 H33 118.9 . . ? 
C33 C34 H33 118.9 . . ? 
C36 C35 C34 120.67(19) . . ? 
C36 C35 H32 119.7 . . ? 
C34 C35 H32 119.7 . . ? 
C35 C36 C37 118.6(2) . . ? 
C35 C36 H31 120.7 . . ? 
C37 C36 H31 120.7 . . ? 
C38 C37 C36 121.0(2) . . ? 
C38 C37 H30 119.5 . . ? 
C36 C37 H30 119.5 . . ? 
C37 C38 C33 121.71(19) . . ? 
C37 C38 H29 119.1 . . ? 
C33 C38 H29 119.1 . . ? 
C40 C39 Fe1 108.21(12) . . ? 
C40 C39 H39A 110.1 . . ? 
Fe1 C39 H39A 110.1 . . ? 
C40 C39 H39B 110.1 . . ? 
Fe1 C39 H39B 110.1 . . ? 
H39A C39 H39B 108.4 . . ? 
C41 C40 C45 116.15(17) . . ? 
C41 C40 C39 121.96(18) . . ? 
C45 C40 C39 121.68(17) . . ? 
C42 C41 C40 121.98(18) . . ? 
C42 C41 H38 119.0 . . ? 
C40 C41 H38 119.0 . . ? 
C43 C42 C41 120.57(19) . . ? 
C43 C42 H37 119.7 . . ? 
C41 C42 H37 119.7 . . ? 
C44 C43 C42 118.73(19) . . ? 
C44 C43 H36 120.6 . . ? 
C42 C43 H36 120.6 . . ? 
C43 C44 C45 120.69(19) . . ? 
C43 C44 H35 119.7 . . ? 
C45 C44 H35 119.7 . . ? 
C44 C45 C40 121.86(18) . . ? 
C44 C45 H34 119.1 . . ? 
C40 C45 H34 119.1 . . ? 
 
loop_ 
 _geom_torsion_atom_site_label_1 
 _geom_torsion_atom_site_label_2 
 _geom_torsion_atom_site_label_3 
 _geom_torsion_atom_site_label_4 
 _geom_torsion 
 _geom_torsion_site_symmetry_1 
 _geom_torsion_site_symmetry_2 
 _geom_torsion_site_symmetry_3 
 _geom_torsion_site_symmetry_4 
 _geom_torsion_publ_flag 
C2 N1 N2 C17 5.34(18) . . . . ? 
C26 N1 N2 C17 163.49(16) . . . . ? 
C2 N1 N2 C11 161.04(16) . . . . ? 
C26 N1 N2 C11 -40.8(2) . . . . ? 
C32 Fe1 C1 C17 -108.69(17) . . . . ? 
C39 Fe1 C1 C17 80.99(18) . . . . ? 
C32 Fe1 C1 C2 63.72(18) . . . . ? 
C39 Fe1 C1 C2 -106.60(17) . . . . ? 
C3 O1 C2 N1 -164.39(15) . . . . ? 
C3 O1 C2 C1 16.1(3) . . . . ? 
N2 N1 C2 O1 175.56(14) . . . . ? 
C26 N1 C2 O1 19.4(3) . . . . ? 
N2 N1 C2 C1 -4.8(2) . . . . ? 
C26 N1 C2 C1 -160.99(17) . . . . ? 
C17 C1 C2 O1 -178.38(19) . . . . ? 
Fe1 C1 C2 O1 7.5(3) . . . . ? 
C17 C1 C2 N1 2.1(2) . . . . ? 
Fe1 C1 C2 N1 -172.04(12) . . . . ? 
C2 O1 C3 C8 71.9(2) . . . . ? 
C2 O1 C3 C4 -115.60(18) . . . . ? 
C8 C3 C4 C5 -2.8(3) . . . . ? 
O1 C3 C4 C5 -174.90(15) . . . . ? 
C8 C3 C4 C10 175.90(18) . . . . ? 
O1 C3 C4 C10 3.8(2) . . . . ? 
C3 C4 C5 C6 1.6(3) . . . . ? 
C10 C4 C5 C6 -177.09(19) . . . . ? 
C4 C5 C6 C7 0.3(3) . . . . ? 
C5 C6 C7 C8 -1.2(3) . . . . ? 
C4 C3 C8 C7 2.0(3) . . . . ? 
O1 C3 C8 C7 173.82(16) . . . . ? 
C4 C3 C8 C9 -176.16(18) . . . . ? 
O1 C3 C8 C9 -4.3(3) . . . . ? 
C6 C7 C8 C3 0.1(3) . . . . ? 
C6 C7 C8 C9 178.3(2) . . . . ? 
C17 N2 C11 C16 -117.7(2) . . . . ? 
N1 N2 C11 C16 92.1(2) . . . . ? 
C17 N2 C11 C12 59.3(3) . . . . ? 
N1 N2 C11 C12 -91.0(2) . . . . ? 
C16 C11 C12 C13 0.8(3) . . . . ? 
N2 C11 C12 C13 -176.06(17) . . . . ? 
C11 C12 C13 C14 -1.0(3) . . . . ? 
C12 C13 C14 C15 0.1(3) . . . . ? 
C13 C14 C15 C16 0.8(3) . . . . ? 
C12 C11 C16 C15 0.1(3) . . . . ? 
N2 C11 C16 C15 177.04(17) . . . . ? 
C14 C15 C16 C11 -1.0(3) . . . . ? 
C18 O2 C17 N2 178.03(15) . . . . ? 
C18 O2 C17 C1 -3.2(3) . . . . ? 
N1 N2 C17 O2 174.54(14) . . . . ? 
C11 N2 C17 O2 20.3(3) . . . . ? 
N1 N2 C17 C1 -4.5(2) . . . . ? 
C11 N2 C17 C1 -158.70(17) . . . . ? 
C2 C1 C17 O2 -177.16(19) . . . . ? 
Fe1 C1 C17 O2 -3.1(3) . . . . ? 
C2 C1 C17 N2 1.6(2) . . . . ? 
Fe1 C1 C17 N2 175.69(12) . . . . ? 
C17 O2 C18 C23 -97.54(19) . . . . ? 
C17 O2 C18 C19 90.4(2) . . . . ? 
C23 C18 C19 C20 0.6(3) . . . . ? 
O2 C18 C19 C20 172.07(15) . . . . ? 
C23 C18 C19 C25 -178.02(18) . . . . ? 
O2 C18 C19 C25 -6.6(2) . . . . ? 
C18 C19 C20 C21 -1.8(3) . . . . ? 
C25 C19 C20 C21 176.79(18) . . . . ? 
C19 C20 C21 C22 1.6(3) . . . . ? 
C20 C21 C22 C23 -0.1(3) . . . . ? 
C19 C18 C23 C22 0.8(3) . . . . ? 
O2 C18 C23 C22 -170.66(16) . . . . ? 
C19 C18 C23 C24 -178.60(18) . . . . ? 
O2 C18 C23 C24 9.9(3) . . . . ? 
C21 C22 C23 C18 -1.1(3) . . . . ? 
C21 C22 C23 C24 178.33(19) . . . . ? 
C2 N1 C26 C31 -102.0(2) . . . . ? 
N2 N1 C26 C31 105.2(2) . . . . ? 
C2 N1 C26 C27 76.4(2) . . . . ? 
N2 N1 C26 C27 -76.4(2) . . . . ? 
C31 C26 C27 C28 0.4(3) . . . . ? 
N1 C26 C27 C28 -177.97(18) . . . . ? 
C26 C27 C28 C29 -0.2(3) . . . . ? 
C27 C28 C29 C30 0.1(4) . . . . ? 
C28 C29 C30 C31 -0.1(4) . . . . ? 
C27 C26 C31 C30 -0.4(3) . . . . ? 
N1 C26 C31 C30 177.91(19) . . . . ? 
C29 C30 C31 C26 0.3(4) . . . . ? 
C39 Fe1 C32 C33 -113.30(16) . . . . ? 
C1 Fe1 C32 C33 75.23(17) . . . . ? 
Fe1 C32 C33 C34 -102.74(19) . . . . ? 
Fe1 C32 C33 C38 75.6(2) . . . . ? 
C38 C33 C34 C35 -2.7(3) . . . . ? 
C32 C33 C34 C35 175.65(18) . . . . ? 
C33 C34 C35 C36 1.1(3) . . . . ? 
C34 C35 C36 C37 1.2(3) . . . . ? 
C35 C36 C37 C38 -1.7(3) . . . . ? 
C36 C37 C38 C33 -0.1(3) . . . . ? 
C34 C33 C38 C37 2.3(3) . . . . ? 
C32 C33 C38 C37 -176.13(18) . . . . ? 
C32 Fe1 C39 C40 11.26(16) . . . . ? 
C1 Fe1 C39 C40 -177.71(12) . . . . ? 
Fe1 C39 C40 C41 -88.30(19) . . . . ? 
Fe1 C39 C40 C45 86.29(18) . . . . ? 
C45 C40 C41 C42 -0.4(3) . . . . ? 
C39 C40 C41 C42 174.42(18) . . . . ? 
C40 C41 C42 C43 0.7(3) . . . . ? 
C41 C42 C43 C44 -0.4(3) . . . . ? 
C42 C43 C44 C45 0.0(3) . . . . ? 
C43 C44 C45 C40 0.3(3) . . . . ? 
C41 C40 C45 C44 0.0(3) . . . . ? 
C39 C40 C45 C44 -174.93(17) . . . . ? 
 
_diffrn_measured_fraction_theta_max    0.997 
_diffrn_reflns_theta_full              27.53 
_diffrn_measured_fraction_theta_full   0.997 
_refine_diff_density_max    0.255 
_refine_diff_density_min   -0.342 
_refine_diff_density_rms    0.050 


#===end

data_cp020_0m 
 
_audit_creation_method            SHELXL-97 
_chemical_name_systematic 
; 
 ? 
; 
_chemical_name_common             ? 
_chemical_melting_point           ? 
_chemical_formula_moiety          ? 
_chemical_formula_sum 
 'C41 H34 Fe N2 O6' 
_chemical_formula_weight          706.55 
 
loop_ 
 _atom_type_symbol 
 _atom_type_description 
 _atom_type_scat_dispersion_real 
 _atom_type_scat_dispersion_imag 
 _atom_type_scat_source 
 'C'  'C'   0.0033   0.0016 
 'International Tables Vol C Tables 4.2.6.8 and 6.1.1.4' 
 'H'  'H'   0.0000   0.0000 
 'International Tables Vol C Tables 4.2.6.8 and 6.1.1.4' 
 'Fe'  'Fe'   0.3463   0.8444 
 'International Tables Vol C Tables 4.2.6.8 and 6.1.1.4' 
 'N'  'N'   0.0061   0.0033 
 'International Tables Vol C Tables 4.2.6.8 and 6.1.1.4' 
 'O'  'O'   0.0106   0.0060 
 'International Tables Vol C Tables 4.2.6.8 and 6.1.1.4' 
 
_symmetry_cell_setting            Triclinic
_symmetry_space_group_name_H-M    P-1 
 
loop_ 
 _symmetry_equiv_pos_as_xyz 
 'x, y, z' 
 '-x, -y, -z' 
 
_cell_length_a                    11.2843(8) 
_cell_length_b                    12.3459(7) 
_cell_length_c                    14.5700(10) 
_cell_angle_alpha                 109.054(3) 
_cell_angle_beta                  104.225(3) 
_cell_angle_gamma                 100.875(3) 
_cell_volume                      1777.9(2) 
_cell_formula_units_Z             2 
_cell_measurement_temperature     150(2) 
_cell_measurement_reflns_used     ? 
_cell_measurement_theta_min       ? 
_cell_measurement_theta_max       ? 
 
_exptl_crystal_description        Block 
_exptl_crystal_colour             Yellow 
_exptl_crystal_size_max           0.2 
_exptl_crystal_size_mid           0.2 
_exptl_crystal_size_min           0.1 
_exptl_crystal_density_meas       ? 
_exptl_crystal_density_diffrn     1.320 
_exptl_crystal_density_method     'not measured' 
_exptl_crystal_F_000              736 
_exptl_absorpt_coefficient_mu     0.474 
_exptl_absorpt_correction_type    multi-scan 
_exptl_absorpt_correction_T_min   0.6968 
_exptl_absorpt_correction_T_max   0.7456 
_exptl_absorpt_process_details    SADABS 
 
_exptl_special_details 
; 
 ? 
; 
 
_diffrn_ambient_temperature       150(2) 
_diffrn_radiation_wavelength      0.71073 
_diffrn_radiation_type            MoK\a 
_diffrn_radiation_source          'fine-focus sealed tube' 
_diffrn_radiation_monochromator   graphite 
_diffrn_measurement_device_type   ? 
_diffrn_measurement_method        ? 
_diffrn_detector_area_resol_mean  ? 
_diffrn_reflns_number             29973 
_diffrn_reflns_av_R_equivalents   0.0255 
_diffrn_reflns_av_sigmaI/netI     0.0263 
_diffrn_reflns_limit_h_min        -14 
_diffrn_reflns_limit_h_max        14 
_diffrn_reflns_limit_k_min        -16 
_diffrn_reflns_limit_k_max        15 
_diffrn_reflns_limit_l_min        -18 
_diffrn_reflns_limit_l_max        18 
_diffrn_reflns_theta_min          1.57 
_diffrn_reflns_theta_max          27.43 
_reflns_number_total              8072 
_reflns_number_gt                 6903 
_reflns_threshold_expression      >2sigma(I) 
 
_computing_data_collection        ? 
_computing_cell_refinement        ? 
_computing_data_reduction         ? 
_computing_structure_solution     'SHELXS-97 (Sheldrick, 2008)' 
_computing_structure_refinement   'SHELXL-97 (Sheldrick, 2008)' 
_computing_molecular_graphics     ? 
_computing_publication_material   ? 
 
_refine_special_details 
; 
 Refinement of F^2^ against ALL reflections.  The weighted R-factor wR and 
 goodness of fit S are based on F^2^, conventional R-factors R are based 
 on F, with F set to zero for negative F^2^. The threshold expression of 
 F^2^ > 2sigma(F^2^) is used only for calculating R-factors(gt) etc. and is 
 not relevant to the choice of reflections for refinement.  R-factors based 
 on F^2^ are statistically about twice as large as those based on F, and R- 
 factors based on ALL data will be even larger. 
; 
 
_refine_ls_structure_factor_coef  Fsqd  
_refine_ls_matrix_type            full 
_refine_ls_weighting_scheme       calc  
_refine_ls_weighting_details 
 'calc w=1/[\s^2^(Fo^2^)+(0.0595P)^2^+1.3065P] where P=(Fo^2^+2Fc^2^)/3' 
_atom_sites_solution_primary      direct 
_atom_sites_solution_secondary    difmap 
_atom_sites_solution_hydrogens    geom 
_refine_ls_hydrogen_treatment     constr 
_refine_ls_extinction_method      none 
_refine_ls_extinction_coef        ? 
_refine_ls_number_reflns          8072 
_refine_ls_number_parameters      451 
_refine_ls_number_restraints      0 
_refine_ls_R_factor_all           0.0495 
_refine_ls_R_factor_gt            0.0408 
_refine_ls_wR_factor_ref          0.1185 
_refine_ls_wR_factor_gt           0.1125 
_refine_ls_goodness_of_fit_ref    1.054 
_refine_ls_restrained_S_all       1.054 
_refine_ls_shift/su_max           0.043 
_refine_ls_shift/su_mean          0.002 
 
loop_ 
 _atom_site_label 
 _atom_site_type_symbol 
 _atom_site_fract_x 
 _atom_site_fract_y 
 _atom_site_fract_z 
 _atom_site_U_iso_or_equiv 
 _atom_site_adp_type 
 _atom_site_occupancy 
 _atom_site_symmetry_multiplicity 
 _atom_site_calc_flag 
 _atom_site_refinement_flags 
 _atom_site_disorder_assembly 
 _atom_site_disorder_group 
Fe1 Fe 0.73661(2) -0.02331(2) 0.27736(2) 0.01974(9) Uani 1 1 d . . . 
O1 O 0.66903(15) -0.27610(14) 0.13585(13) 0.0403(4) Uani 1 1 d . . . 
O2 O 0.71165(16) 0.04717(16) 0.48370(12) 0.0424(4) Uani 1 1 d . . . 
O3 O 0.82651(18) 0.15784(17) 0.19965(16) 0.0494(5) Uani 1 1 d . . . 
O5 O 0.59309(12) 0.20144(10) 0.29059(10) 0.0205(3) Uani 1 1 d . . . 
O6 O 0.42253(12) -0.22048(10) 0.15890(10) 0.0210(3) Uani 1 1 d . . . 
O4 O 1.00069(14) -0.02125(15) 0.36505(14) 0.0418(4) Uani 1 1 d . . . 
N1 N 0.38450(14) 0.06670(12) 0.22723(12) 0.0185(3) Uani 1 1 d . . . 
N2 N 0.33611(14) -0.05774(12) 0.19685(12) 0.0189(3) Uani 1 1 d . . . 
C4 C 0.89716(19) -0.02301(17) 0.32873(16) 0.0277(4) Uani 1 1 d . . . 
C1 C 0.69027(18) -0.17769(18) 0.18982(16) 0.0267(4) Uani 1 1 d . . . 
C2 C 0.72239(18) 0.01933(18) 0.40336(16) 0.0261(4) Uani 1 1 d . . . 
C5 C 0.55530(17) -0.01343(15) 0.23502(14) 0.0178(3) Uani 1 1 d . . . 
C7 C 0.51548(17) 0.08874(15) 0.25139(13) 0.0173(3) Uani 1 1 d . . . 
C8 C 0.32044(17) 0.13909(15) 0.28664(14) 0.0190(3) Uani 1 1 d . . . 
C9 C 0.32093(19) 0.13456(17) 0.38054(15) 0.0256(4) Uani 1 1 d . . . 
H9A H 0.3641 0.0879 0.4061 0.031 Uiso 1 1 calc R . . 
C10 C 0.2565(2) 0.20030(19) 0.43616(17) 0.0315(4) Uani 1 1 d . . . 
H10A H 0.2558 0.1974 0.4990 0.038 Uiso 1 1 calc R . . 
C11 C 0.1931(2) 0.27043(18) 0.39776(18) 0.0332(5) Uani 1 1 d . . . 
H11A H 0.1502 0.3147 0.4351 0.040 Uiso 1 1 calc R . . 
C12 C 0.1937(2) 0.27454(19) 0.30419(19) 0.0342(5) Uani 1 1 d . . . 
H12A H 0.1518 0.3224 0.2793 0.041 Uiso 1 1 calc R . . 
C13 C 0.25650(19) 0.20767(18) 0.24678(16) 0.0270(4) Uani 1 1 d . . . 
H13A H 0.2555 0.2091 0.1832 0.032 Uiso 1 1 calc R . . 
C15 C 0.20147(17) -0.11190(15) 0.13824(15) 0.0211(4) Uani 1 1 d . . . 
C16 C 0.1578(2) -0.1134(2) 0.03985(17) 0.0344(5) Uani 1 1 d . . . 
H16A H 0.2147 -0.0839 0.0110 0.041 Uiso 1 1 calc R . . 
C17 C 0.0273(2) -0.1601(2) -0.0148(2) 0.0470(6) Uani 1 1 d . . . 
H17A H -0.0037 -0.1617 -0.0807 0.056 Uiso 1 1 calc R . . 
C18 C -0.0564(2) -0.2039(2) 0.0285(2) 0.0437(6) Uani 1 1 d . . . 
H18A H -0.1435 -0.2347 -0.0083 0.052 Uiso 1 1 calc R . . 
C19 C -0.0112(2) -0.20205(19) 0.1266(2) 0.0360(5) Uani 1 1 d . . . 
H19A H -0.0680 -0.2329 0.1548 0.043 Uiso 1 1 calc R . . 
C20 C 0.11872(19) -0.15437(17) 0.18318(17) 0.0267(4) Uani 1 1 d . . . 
H20A H 0.1492 -0.1511 0.2497 0.032 Uiso 1 1 calc R . . 
C6 C 0.43774(17) -0.10216(15) 0.19804(13) 0.0171(3) Uani 1 1 d . . . 
C22 C 0.32630(17) -0.30114(15) 0.17155(15) 0.0195(4) Uani 1 1 d . . . 
C23 C 0.23933(19) -0.39289(16) 0.08178(16) 0.0254(4) Uani 1 1 d . . . 
C24 C 0.1487(2) -0.47580(18) 0.09455(19) 0.0348(5) Uani 1 1 d . . . 
H24A H 0.0891 -0.5391 0.0368 0.042 Uiso 1 1 calc R . . 
C25 C 0.1457(2) -0.4656(2) 0.1916(2) 0.0385(5) Uani 1 1 d . . . 
H25A H 0.0819 -0.5195 0.1982 0.046 Uiso 1 1 calc R . . 
C26 C 0.2374(2) -0.3752(2) 0.27874(18) 0.0336(5) Uani 1 1 d . . . 
H26A H 0.2360 -0.3704 0.3435 0.040 Uiso 1 1 calc R . . 
C27 C 0.33178(19) -0.29141(17) 0.27067(15) 0.0239(4) Uani 1 1 d . . . 
C28 C 0.4365(2) -0.19752(19) 0.36513(16) 0.0327(5) Uani 1 1 d . . . 
H28A H 0.4924 -0.1481 0.3449 0.049 Uiso 1 1 calc R . . 
H28B H 0.4844 -0.2360 0.4016 0.049 Uiso 1 1 calc R . . 
H28C H 0.3994 -0.1488 0.4090 0.049 Uiso 1 1 calc R . . 
C29 C 0.2435(2) -0.4034(2) -0.02299(17) 0.0399(5) Uani 1 1 d . . . 
H29A H 0.3120 -0.3387 -0.0160 0.060 Uiso 1 1 calc R . . 
H29B H 0.1638 -0.3998 -0.0627 0.060 Uiso 1 1 calc R . . 
H29C H 0.2573 -0.4784 -0.0571 0.060 Uiso 1 1 calc R . . 
C30 C 0.54912(17) 0.28876(15) 0.25946(14) 0.0192(4) Uani 1 1 d . . . 
C31 C 0.55705(18) 0.39268(16) 0.33943(15) 0.0222(4) Uani 1 1 d . . . 
C32 C 0.5175(2) 0.48145(18) 0.31196(18) 0.0310(5) Uani 1 1 d . . . 
H32A H 0.5210 0.5521 0.3630 0.037 Uiso 1 1 calc R . . 
C33 C 0.4730(2) 0.4659(2) 0.20966(19) 0.0368(5) Uani 1 1 d . . . 
H33A H 0.4453 0.5253 0.1926 0.044 Uiso 1 1 calc R . . 
C34 C 0.4696(2) 0.36223(19) 0.13250(17) 0.0314(5) Uani 1 1 d . . . 
H34A H 0.4404 0.3534 0.0642 0.038 Uiso 1 1 calc R . . 
C35 C 0.50947(19) 0.27048(17) 0.15572(15) 0.0239(4) Uani 1 1 d . . . 
C36 C 0.5085(2) 0.15994(18) 0.07052(16) 0.0317(5) Uani 1 1 d . . . 
H36A H 0.5382 0.1064 0.0994 0.047 Uiso 1 1 calc R . . 
H36B H 0.5636 0.1828 0.0350 0.047 Uiso 1 1 calc R . . 
H36C H 0.4230 0.1204 0.0231 0.047 Uiso 1 1 calc R . . 
C37 C 0.6045(2) 0.40637(18) 0.44984(16) 0.0307(4) Uani 1 1 d . . . 
H37A H 0.6272 0.3361 0.4526 0.046 Uiso 1 1 calc R . . 
H37B H 0.5384 0.4164 0.4798 0.046 Uiso 1 1 calc R . . 
H37C H 0.6783 0.4753 0.4875 0.046 Uiso 1 1 calc R . . 
C3 C 0.78871(19) 0.08728(19) 0.22953(17) 0.0297(4) Uani 1 1 d . . . 
C77 C 0.0918(4) 0.5170(3) 0.6690(3) 0.0715(11) Uani 1 1 d . . . 
H77A H 0.1158 0.6002 0.6995 0.086 Uiso 1 1 calc R . . 
C78 C -0.0224(3) 0.4547(3) 0.5891(3) 0.0570(8) Uani 1 1 d . . . 
H78A H -0.0749 0.4965 0.5658 0.068 Uiso 1 1 calc R . . 
C79 C -0.0589(3) 0.3324(2) 0.5441(2) 0.0445(6) Uani 1 1 d . . . 
H79A H -0.1354 0.2912 0.4899 0.053 Uiso 1 1 calc R . . 
C81 C 0.0180(3) 0.2711(2) 0.5794(2) 0.0463(6) Uani 1 1 d . . . 
H81A H -0.0075 0.1878 0.5493 0.056 Uiso 1 1 calc R . . 
C89 C 0.1312(3) 0.3299(3) 0.6578(2) 0.0561(7) Uani 1 1 d . . . 
H89A H 0.1823 0.2869 0.6808 0.067 Uiso 1 1 calc R . . 
C90 C 0.1702(3) 0.4544(4) 0.7034(2) 0.0683(10) Uani 1 1 d . . . 
H90A H 0.2480 0.4952 0.7562 0.082 Uiso 1 1 calc R . . 
 
loop_ 
 _atom_site_aniso_label 
 _atom_site_aniso_U_11 
 _atom_site_aniso_U_22 
 _atom_site_aniso_U_33 
 _atom_site_aniso_U_23 
 _atom_site_aniso_U_13 
 _atom_site_aniso_U_12 
Fe1 0.01522(14) 0.02081(13) 0.02201(15) 0.00666(11) 0.00535(11) 0.00682(10) 
O1 0.0307(8) 0.0312(8) 0.0419(10) -0.0030(7) 0.0032(7) 0.0136(6) 
O2 0.0399(10) 0.0563(10) 0.0266(9) 0.0118(8) 0.0133(7) 0.0094(8) 
O3 0.0463(11) 0.0561(11) 0.0658(13) 0.0407(10) 0.0296(10) 0.0149(9) 
O5 0.0179(6) 0.0164(6) 0.0251(7) 0.0084(5) 0.0038(5) 0.0048(5) 
O6 0.0207(7) 0.0156(5) 0.0268(7) 0.0055(5) 0.0112(6) 0.0059(5) 
O4 0.0188(8) 0.0449(9) 0.0526(11) 0.0134(8) 0.0029(7) 0.0114(7) 
N1 0.0167(7) 0.0154(6) 0.0215(8) 0.0056(6) 0.0051(6) 0.0054(5) 
N2 0.0163(7) 0.0154(6) 0.0218(8) 0.0049(6) 0.0041(6) 0.0046(6) 
C4 0.0240(10) 0.0248(9) 0.0299(11) 0.0059(8) 0.0081(9) 0.0070(8) 
C1 0.0177(9) 0.0311(10) 0.0285(11) 0.0082(8) 0.0039(8) 0.0120(8) 
C2 0.0173(9) 0.0299(9) 0.0280(11) 0.0110(8) 0.0038(8) 0.0058(7) 
C5 0.0178(9) 0.0194(8) 0.0167(8) 0.0077(7) 0.0050(7) 0.0063(7) 
C7 0.0165(8) 0.0188(8) 0.0149(8) 0.0061(6) 0.0035(7) 0.0046(6) 
C8 0.0143(8) 0.0171(7) 0.0215(9) 0.0043(7) 0.0038(7) 0.0046(6) 
C9 0.0277(10) 0.0246(9) 0.0238(10) 0.0091(8) 0.0063(8) 0.0098(8) 
C10 0.0352(12) 0.0313(10) 0.0261(11) 0.0065(8) 0.0135(9) 0.0098(9) 
C11 0.0300(11) 0.0272(10) 0.0430(13) 0.0065(9) 0.0198(10) 0.0127(8) 
C12 0.0302(11) 0.0344(11) 0.0484(14) 0.0201(10) 0.0162(10) 0.0211(9) 
C13 0.0243(10) 0.0325(10) 0.0295(11) 0.0155(8) 0.0085(8) 0.0143(8) 
C15 0.0154(9) 0.0189(8) 0.0234(9) 0.0037(7) 0.0035(7) 0.0048(7) 
C16 0.0233(11) 0.0449(12) 0.0274(11) 0.0138(9) 0.0022(9) 0.0023(9) 
C17 0.0302(13) 0.0581(15) 0.0350(13) 0.0152(12) -0.0075(10) 0.0032(11) 
C18 0.0176(10) 0.0409(12) 0.0524(16) 0.0073(11) -0.0029(10) 0.0028(9) 
C19 0.0212(10) 0.0319(10) 0.0513(15) 0.0102(10) 0.0153(10) 0.0063(8) 
C20 0.0223(10) 0.0265(9) 0.0318(11) 0.0093(8) 0.0112(8) 0.0092(8) 
C6 0.0178(8) 0.0193(8) 0.0156(8) 0.0068(6) 0.0060(7) 0.0079(6) 
C22 0.0167(8) 0.0180(8) 0.0255(10) 0.0093(7) 0.0073(7) 0.0072(7) 
C23 0.0225(10) 0.0209(8) 0.0282(10) 0.0068(8) 0.0042(8) 0.0065(7) 
C24 0.0243(11) 0.0246(9) 0.0447(13) 0.0121(9) 0.0002(9) 0.0004(8) 
C25 0.0251(11) 0.0385(11) 0.0570(16) 0.0297(11) 0.0119(11) 0.0030(9) 
C26 0.0322(11) 0.0416(11) 0.0396(13) 0.0263(10) 0.0168(10) 0.0134(9) 
C27 0.0233(10) 0.0253(9) 0.0267(10) 0.0121(8) 0.0084(8) 0.0114(7) 
C28 0.0379(12) 0.0340(10) 0.0226(10) 0.0108(8) 0.0055(9) 0.0091(9) 
C29 0.0437(14) 0.0350(11) 0.0247(11) 0.0018(9) 0.0042(10) 0.0026(10) 
C30 0.0167(8) 0.0179(8) 0.0253(10) 0.0102(7) 0.0070(7) 0.0066(6) 
C31 0.0192(9) 0.0209(8) 0.0257(10) 0.0072(7) 0.0084(8) 0.0062(7) 
C32 0.0356(12) 0.0232(9) 0.0381(12) 0.0104(8) 0.0166(10) 0.0148(8) 
C33 0.0440(13) 0.0330(11) 0.0472(14) 0.0245(10) 0.0172(11) 0.0234(10) 
C34 0.0365(12) 0.0363(11) 0.0301(11) 0.0201(9) 0.0119(9) 0.0164(9) 
C35 0.0245(10) 0.0252(9) 0.0245(10) 0.0112(8) 0.0097(8) 0.0084(7) 
C36 0.0433(13) 0.0305(10) 0.0210(10) 0.0087(8) 0.0116(9) 0.0118(9) 
C37 0.0334(11) 0.0265(9) 0.0247(10) 0.0029(8) 0.0066(9) 0.0087(8) 
C3 0.0220(10) 0.0370(11) 0.0344(12) 0.0158(9) 0.0121(9) 0.0110(8) 
C77 0.081(2) 0.0394(14) 0.086(3) 0.0032(15) 0.059(2) -0.0028(15) 
C78 0.0562(18) 0.0531(16) 0.083(2) 0.0359(16) 0.0399(17) 0.0256(14) 
C79 0.0353(13) 0.0531(14) 0.0457(15) 0.0188(12) 0.0148(11) 0.0130(11) 
C81 0.0504(16) 0.0458(13) 0.0457(15) 0.0179(12) 0.0201(13) 0.0155(12) 
C89 0.0518(17) 0.087(2) 0.0435(16) 0.0360(16) 0.0191(14) 0.0270(16) 
C90 0.0425(16) 0.104(3) 0.0319(15) 0.0067(16) 0.0173(13) -0.0095(17) 
 
_geom_special_details 
; 
 All esds (except the esd in the dihedral angle between two l.s. planes) 
 are estimated using the full covariance matrix.  The cell esds are taken 
 into account individually in the estimation of esds in distances, angles 
 and torsion angles; correlations between esds in cell parameters are only 
 used when they are defined by crystal symmetry.  An approximate (isotropic) 
 treatment of cell esds is used for estimating esds involving l.s. planes. 
; 
 
loop_ 
 _geom_bond_atom_site_label_1 
 _geom_bond_atom_site_label_2 
 _geom_bond_distance 
 _geom_bond_site_symmetry_2 
 _geom_bond_publ_flag 
Fe1 C4 1.781(2) . ? 
Fe1 C3 1.793(2) . ? 
Fe1 C2 1.794(2) . ? 
Fe1 C1 1.801(2) . ? 
Fe1 C5 2.0259(18) . ? 
O1 C1 1.151(2) . ? 
O2 C2 1.151(3) . ? 
O3 C3 1.153(3) . ? 
O5 C7 1.343(2) . ? 
O5 C30 1.423(2) . ? 
O6 C6 1.342(2) . ? 
O6 C22 1.419(2) . ? 
O4 C4 1.151(3) . ? 
N1 C7 1.383(2) . ? 
N1 N2 1.4054(19) . ? 
N1 C8 1.455(2) . ? 
N2 C6 1.360(2) . ? 
N2 C15 1.446(2) . ? 
C5 C7 1.386(2) . ? 
C5 C6 1.402(2) . ? 
C8 C13 1.386(2) . ? 
C8 C9 1.386(3) . ? 
C9 C10 1.388(3) . ? 
C9 H9A 0.9300 . ? 
C10 C11 1.389(3) . ? 
C10 H10A 0.9300 . ? 
C11 C12 1.382(3) . ? 
C11 H11A 0.9300 . ? 
C12 C13 1.395(3) . ? 
C12 H12A 0.9300 . ? 
C13 H13A 0.9300 . ? 
C15 C20 1.384(3) . ? 
C15 C16 1.389(3) . ? 
C16 C17 1.393(3) . ? 
C16 H16A 0.9300 . ? 
C17 C18 1.381(4) . ? 
C17 H17A 0.9300 . ? 
C18 C19 1.385(4) . ? 
C18 H18A 0.9300 . ? 
C19 C20 1.393(3) . ? 
C19 H19A 0.9300 . ? 
C20 H20A 0.9300 . ? 
C22 C23 1.393(3) . ? 
C22 C27 1.394(3) . ? 
C23 C24 1.397(3) . ? 
C23 C29 1.502(3) . ? 
C24 C25 1.387(4) . ? 
C24 H24A 0.9300 . ? 
C25 C26 1.386(3) . ? 
C25 H25A 0.9300 . ? 
C26 C27 1.394(3) . ? 
C26 H26A 0.9300 . ? 
C27 C28 1.509(3) . ? 
C28 H28A 0.9600 . ? 
C28 H28B 0.9600 . ? 
C28 H28C 0.9600 . ? 
C29 H29A 0.9600 . ? 
C29 H29B 0.9600 . ? 
C29 H29C 0.9600 . ? 
C30 C31 1.393(3) . ? 
C30 C35 1.394(3) . ? 
C31 C32 1.394(3) . ? 
C31 C37 1.506(3) . ? 
C32 C33 1.385(3) . ? 
C32 H32A 0.9300 . ? 
C33 C34 1.387(3) . ? 
C33 H33A 0.9300 . ? 
C34 C35 1.403(3) . ? 
C34 H34A 0.9300 . ? 
C35 C36 1.512(3) . ? 
C36 H36A 0.9600 . ? 
C36 H36B 0.9600 . ? 
C36 H36C 0.9600 . ? 
C37 H37A 0.9600 . ? 
C37 H37B 0.9600 . ? 
C37 H37C 0.9600 . ? 
C77 C78 1.382(5) . ? 
C77 C90 1.387(5) . ? 
C77 H77A 0.9300 . ? 
C78 C79 1.365(4) . ? 
C78 H78A 0.9300 . ? 
C79 C81 1.369(4) . ? 
C79 H79A 0.9300 . ? 
C81 C89 1.362(4) . ? 
C81 H81A 0.9300 . ? 
C89 C90 1.389(5) . ? 
C89 H89A 0.9300 . ? 
C90 H90A 0.9300 . ? 
 
loop_ 
 _geom_angle_atom_site_label_1 
 _geom_angle_atom_site_label_2 
 _geom_angle_atom_site_label_3 
 _geom_angle 
 _geom_angle_site_symmetry_1 
 _geom_angle_site_symmetry_3 
 _geom_angle_publ_flag 
C4 Fe1 C3 90.88(9) . . ? 
C4 Fe1 C2 90.23(9) . . ? 
C3 Fe1 C2 121.13(9) . . ? 
C4 Fe1 C1 92.25(9) . . ? 
C3 Fe1 C1 116.59(10) . . ? 
C2 Fe1 C1 122.16(9) . . ? 
C4 Fe1 C5 173.71(8) . . ? 
C3 Fe1 C5 90.82(8) . . ? 
C2 Fe1 C5 83.70(8) . . ? 
C1 Fe1 C5 92.40(8) . . ? 
C7 O5 C30 119.14(14) . . ? 
C6 O6 C22 120.34(14) . . ? 
C7 N1 N2 104.92(13) . . ? 
C7 N1 C8 125.35(14) . . ? 
N2 N1 C8 115.44(14) . . ? 
C6 N2 N1 106.44(14) . . ? 
C6 N2 C15 131.58(15) . . ? 
N1 N2 C15 116.94(14) . . ? 
O4 C4 Fe1 177.8(2) . . ? 
O1 C1 Fe1 175.47(17) . . ? 
O2 C2 Fe1 178.98(19) . . ? 
C7 C5 C6 100.86(15) . . ? 
C7 C5 Fe1 127.77(13) . . ? 
C6 C5 Fe1 130.64(13) . . ? 
O5 C7 N1 120.66(15) . . ? 
O5 C7 C5 125.30(16) . . ? 
N1 C7 C5 114.00(15) . . ? 
C13 C8 C9 121.37(18) . . ? 
C13 C8 N1 119.51(17) . . ? 
C9 C8 N1 119.08(16) . . ? 
C8 C9 C10 119.47(18) . . ? 
C8 C9 H9A 120.3 . . ? 
C10 C9 H9A 120.3 . . ? 
C9 C10 C11 119.9(2) . . ? 
C9 C10 H10A 120.1 . . ? 
C11 C10 H10A 120.1 . . ? 
C12 C11 C10 120.14(19) . . ? 
C12 C11 H11A 119.9 . . ? 
C10 C11 H11A 119.9 . . ? 
C11 C12 C13 120.64(19) . . ? 
C11 C12 H12A 119.7 . . ? 
C13 C12 H12A 119.7 . . ? 
C8 C13 C12 118.52(19) . . ? 
C8 C13 H13A 120.7 . . ? 
C12 C13 H13A 120.7 . . ? 
C20 C15 C16 121.77(18) . . ? 
C20 C15 N2 119.56(17) . . ? 
C16 C15 N2 118.57(17) . . ? 
C15 C16 C17 118.7(2) . . ? 
C15 C16 H16A 120.6 . . ? 
C17 C16 H16A 120.6 . . ? 
C18 C17 C16 120.2(2) . . ? 
C18 C17 H17A 119.9 . . ? 
C16 C17 H17A 119.9 . . ? 
C17 C18 C19 120.3(2) . . ? 
C17 C18 H18A 119.9 . . ? 
C19 C18 H18A 119.9 . . ? 
C18 C19 C20 120.5(2) . . ? 
C18 C19 H19A 119.8 . . ? 
C20 C19 H19A 119.8 . . ? 
C15 C20 C19 118.5(2) . . ? 
C15 C20 H20A 120.7 . . ? 
C19 C20 H20A 120.7 . . ? 
O6 C6 N2 121.73(15) . . ? 
O6 C6 C5 124.45(16) . . ? 
N2 C6 C5 113.59(15) . . ? 
C23 C22 C27 124.40(17) . . ? 
C23 C22 O6 116.25(16) . . ? 
C27 C22 O6 119.03(16) . . ? 
C22 C23 C24 116.22(19) . . ? 
C22 C23 C29 122.06(18) . . ? 
C24 C23 C29 121.71(19) . . ? 
C25 C24 C23 121.3(2) . . ? 
C25 C24 H24A 119.3 . . ? 
C23 C24 H24A 119.3 . . ? 
C26 C25 C24 120.18(19) . . ? 
C26 C25 H25A 119.9 . . ? 
C24 C25 H25A 119.9 . . ? 
C25 C26 C27 120.9(2) . . ? 
C25 C26 H26A 119.5 . . ? 
C27 C26 H26A 119.5 . . ? 
C26 C27 C22 116.76(19) . . ? 
C26 C27 C28 121.09(19) . . ? 
C22 C27 C28 122.13(17) . . ? 
C27 C28 H28A 109.5 . . ? 
C27 C28 H28B 109.5 . . ? 
H28A C28 H28B 109.5 . . ? 
C27 C28 H28C 109.5 . . ? 
H28A C28 H28C 109.5 . . ? 
H28B C28 H28C 109.5 . . ? 
C23 C29 H29A 109.5 . . ? 
C23 C29 H29B 109.5 . . ? 
H29A C29 H29B 109.5 . . ? 
C23 C29 H29C 109.5 . . ? 
H29A C29 H29C 109.5 . . ? 
H29B C29 H29C 109.5 . . ? 
C31 C30 C35 124.44(16) . . ? 
C31 C30 O5 115.21(16) . . ? 
C35 C30 O5 120.23(16) . . ? 
C30 C31 C32 116.84(18) . . ? 
C30 C31 C37 120.96(16) . . ? 
C32 C31 C37 122.19(17) . . ? 
C33 C32 C31 120.91(19) . . ? 
C33 C32 H32A 119.5 . . ? 
C31 C32 H32A 119.5 . . ? 
C32 C33 C34 120.43(18) . . ? 
C32 C33 H33A 119.8 . . ? 
C34 C33 H33A 119.8 . . ? 
C33 C34 C35 121.1(2) . . ? 
C33 C34 H34A 119.5 . . ? 
C35 C34 H34A 119.5 . . ? 
C30 C35 C34 116.20(18) . . ? 
C30 C35 C36 123.67(17) . . ? 
C34 C35 C36 120.13(18) . . ? 
C35 C36 H36A 109.5 . . ? 
C35 C36 H36B 109.5 . . ? 
H36A C36 H36B 109.5 . . ? 
C35 C36 H36C 109.5 . . ? 
H36A C36 H36C 109.5 . . ? 
H36B C36 H36C 109.5 . . ? 
C31 C37 H37A 109.5 . . ? 
C31 C37 H37B 109.5 . . ? 
H37A C37 H37B 109.5 . . ? 
C31 C37 H37C 109.5 . . ? 
H37A C37 H37C 109.5 . . ? 
H37B C37 H37C 109.5 . . ? 
O3 C3 Fe1 177.55(19) . . ? 
C78 C77 C90 119.5(3) . . ? 
C78 C77 H77A 120.3 . . ? 
C90 C77 H77A 120.3 . . ? 
C79 C78 C77 120.8(3) . . ? 
C79 C78 H78A 119.6 . . ? 
C77 C78 H78A 119.6 . . ? 
C78 C79 C81 119.5(3) . . ? 
C78 C79 H79A 120.3 . . ? 
C81 C79 H79A 120.3 . . ? 
C89 C81 C79 121.1(3) . . ? 
C89 C81 H81A 119.4 . . ? 
C79 C81 H81A 119.4 . . ? 
C81 C89 C90 120.0(3) . . ? 
C81 C89 H89A 120.0 . . ? 
C90 C89 H89A 120.0 . . ? 
C77 C90 C89 119.2(3) . . ? 
C77 C90 H90A 120.4 . . ? 
C89 C90 H90A 120.4 . . ? 
 
loop_ 
 _geom_torsion_atom_site_label_1 
 _geom_torsion_atom_site_label_2 
 _geom_torsion_atom_site_label_3 
 _geom_torsion_atom_site_label_4 
 _geom_torsion 
 _geom_torsion_site_symmetry_1 
 _geom_torsion_site_symmetry_2 
 _geom_torsion_site_symmetry_3 
 _geom_torsion_site_symmetry_4 
 _geom_torsion_publ_flag 
C7 N1 N2 C6 -3.93(18) . . . . ? 
C8 N1 N2 C6 -146.10(15) . . . . ? 
C7 N1 N2 C15 -161.77(15) . . . . ? 
C8 N1 N2 C15 56.1(2) . . . . ? 
C3 Fe1 C4 O4 113(5) . . . . ? 
C2 Fe1 C4 O4 -8(5) . . . . ? 
C1 Fe1 C4 O4 -130(5) . . . . ? 
C5 Fe1 C4 O4 7(5) . . . . ? 
C4 Fe1 C1 O1 -7(3) . . . . ? 
C3 Fe1 C1 O1 85(3) . . . . ? 
C2 Fe1 C1 O1 -99(3) . . . . ? 
C5 Fe1 C1 O1 177(100) . . . . ? 
C4 Fe1 C2 O2 164(12) . . . . ? 
C3 Fe1 C2 O2 73(12) . . . . ? 
C1 Fe1 C2 O2 -103(12) . . . . ? 
C5 Fe1 C2 O2 -14(12) . . . . ? 
C4 Fe1 C5 C7 59.4(8) . . . . ? 
C3 Fe1 C5 C7 -46.22(17) . . . . ? 
C2 Fe1 C5 C7 75.02(17) . . . . ? 
C1 Fe1 C5 C7 -162.88(17) . . . . ? 
C4 Fe1 C5 C6 -108.8(7) . . . . ? 
C3 Fe1 C5 C6 145.50(18) . . . . ? 
C2 Fe1 C5 C6 -93.25(18) . . . . ? 
C1 Fe1 C5 C6 28.84(18) . . . . ? 
C30 O5 C7 N1 -33.0(2) . . . . ? 
C30 O5 C7 C5 149.52(17) . . . . ? 
N2 N1 C7 O5 -175.34(15) . . . . ? 
C8 N1 C7 O5 -38.1(2) . . . . ? 
N2 N1 C7 C5 2.4(2) . . . . ? 
C8 N1 C7 C5 139.59(17) . . . . ? 
C6 C5 C7 O5 177.76(17) . . . . ? 
Fe1 C5 C7 O5 6.8(3) . . . . ? 
C6 C5 C7 N1 0.2(2) . . . . ? 
Fe1 C5 C7 N1 -170.79(12) . . . . ? 
C7 N1 C8 C13 110.0(2) . . . . ? 
N2 N1 C8 C13 -116.59(18) . . . . ? 
C7 N1 C8 C9 -72.3(2) . . . . ? 
N2 N1 C8 C9 61.1(2) . . . . ? 
C13 C8 C9 C10 -0.2(3) . . . . ? 
N1 C8 C9 C10 -177.91(17) . . . . ? 
C8 C9 C10 C11 -0.4(3) . . . . ? 
C9 C10 C11 C12 0.2(3) . . . . ? 
C10 C11 C12 C13 0.7(3) . . . . ? 
C9 C8 C13 C12 1.1(3) . . . . ? 
N1 C8 C13 C12 178.77(18) . . . . ? 
C11 C12 C13 C8 -1.3(3) . . . . ? 
C6 N2 C15 C20 99.4(2) . . . . ? 
N1 N2 C15 C20 -109.57(19) . . . . ? 
C6 N2 C15 C16 -84.3(2) . . . . ? 
N1 N2 C15 C16 66.8(2) . . . . ? 
C20 C15 C16 C17 -0.5(3) . . . . ? 
N2 C15 C16 C17 -176.8(2) . . . . ? 
C15 C16 C17 C18 -0.1(4) . . . . ? 
C16 C17 C18 C19 -0.1(4) . . . . ? 
C17 C18 C19 C20 1.0(4) . . . . ? 
C16 C15 C20 C19 1.4(3) . . . . ? 
N2 C15 C20 C19 177.62(17) . . . . ? 
C18 C19 C20 C15 -1.6(3) . . . . ? 
C22 O6 C6 N2 -38.1(2) . . . . ? 
C22 O6 C6 C5 147.68(17) . . . . ? 
N1 N2 C6 O6 -170.33(15) . . . . ? 
C15 N2 C6 O6 -17.0(3) . . . . ? 
N1 N2 C6 C5 4.4(2) . . . . ? 
C15 N2 C6 C5 157.71(18) . . . . ? 
C7 C5 C6 O6 171.72(16) . . . . ? 
Fe1 C5 C6 O6 -17.7(3) . . . . ? 
C7 C5 C6 N2 -2.9(2) . . . . ? 
Fe1 C5 C6 N2 167.71(13) . . . . ? 
C6 O6 C22 C23 124.37(18) . . . . ? 
C6 O6 C22 C27 -61.8(2) . . . . ? 
C27 C22 C23 C24 3.4(3) . . . . ? 
O6 C22 C23 C24 176.84(16) . . . . ? 
C27 C22 C23 C29 -175.82(19) . . . . ? 
O6 C22 C23 C29 -2.4(3) . . . . ? 
C22 C23 C24 C25 0.6(3) . . . . ? 
C29 C23 C24 C25 179.9(2) . . . . ? 
C23 C24 C25 C26 -3.1(3) . . . . ? 
C24 C25 C26 C27 1.7(3) . . . . ? 
C25 C26 C27 C22 2.0(3) . . . . ? 
C25 C26 C27 C28 -176.2(2) . . . . ? 
C23 C22 C27 C26 -4.7(3) . . . . ? 
O6 C22 C27 C26 -177.98(16) . . . . ? 
C23 C22 C27 C28 173.49(18) . . . . ? 
O6 C22 C27 C28 0.2(3) . . . . ? 
C7 O5 C30 C31 126.21(17) . . . . ? 
C7 O5 C30 C35 -57.6(2) . . . . ? 
C35 C30 C31 C32 2.6(3) . . . . ? 
O5 C30 C31 C32 178.61(16) . . . . ? 
C35 C30 C31 C37 -178.24(18) . . . . ? 
O5 C30 C31 C37 -2.2(3) . . . . ? 
C30 C31 C32 C33 -0.2(3) . . . . ? 
C37 C31 C32 C33 -179.4(2) . . . . ? 
C31 C32 C33 C34 -1.4(3) . . . . ? 
C32 C33 C34 C35 0.7(4) . . . . ? 
C31 C30 C35 C34 -3.2(3) . . . . ? 
O5 C30 C35 C34 -179.03(17) . . . . ? 
C31 C30 C35 C36 176.46(19) . . . . ? 
O5 C30 C35 C36 0.7(3) . . . . ? 
C33 C34 C35 C30 1.5(3) . . . . ? 
C33 C34 C35 C36 -178.2(2) . . . . ? 
C4 Fe1 C3 O3 10(5) . . . . ? 
C2 Fe1 C3 O3 100(5) . . . . ? 
C1 Fe1 C3 O3 -83(5) . . . . ? 
C5 Fe1 C3 O3 -176(100) . . . . ? 
C90 C77 C78 C79 0.3(5) . . . . ? 
C77 C78 C79 C81 0.7(4) . . . . ? 
C78 C79 C81 C89 -0.9(4) . . . . ? 
C79 C81 C89 C90 0.0(4) . . . . ? 
C78 C77 C90 C89 -1.1(4) . . . . ? 
C81 C89 C90 C77 1.0(4) . . . . ? 
 
_diffrn_measured_fraction_theta_max    0.995 
_diffrn_reflns_theta_full              27.43 
_diffrn_measured_fraction_theta_full   0.995 
_refine_diff_density_max    0.619 
_refine_diff_density_min   -0.600 
_refine_diff_density_rms    0.060 

#===end
